# Supplementary material
Source: PubMed Central journal article supplement (PMC11106715)
Supplement: jama-e246281-s001.pdf [file jama-e246281-s001.pdf]

1  
2  
3

## SUPPLEMENTARY MATERIALS TABLE OF CONTENTS

| Section                                                                                                                                                                                                                                                                                                                                                                                                                                                                                                                                                                                                                                                                                                                                                                                                                                                                                                                                                                                                                                                                                             | Page Number |
|-----------------------------------------------------------------------------------------------------------------------------------------------------------------------------------------------------------------------------------------------------------------------------------------------------------------------------------------------------------------------------------------------------------------------------------------------------------------------------------------------------------------------------------------------------------------------------------------------------------------------------------------------------------------------------------------------------------------------------------------------------------------------------------------------------------------------------------------------------------------------------------------------------------------------------------------------------------------------------------------------------------------------------------------------------------------------------------------------------|-------------|
| <b>(1) DEFINING THE “TRIAL EFFECT”</b><br><ul style="list-style-type: none"> <li>• eFigure 1. Directed Acyclic Graph (DAG) showing our definition of the participation effect (based on blue mediators) that excludes the experimental treatment or prognostic confounders.</li> <li>• eTable 1. Term definitions to describe the different reasons why trial participant and routine care patient outcomes may differ. These could be attributed to a participation effect, trial effect, or observed differences in general.</li> <li>• eTable 2. Prognostic confounders relevant to observing trial effects with definitions and examples.</li> </ul>                                                                                                                                                                                                                                                                                                                                                                                                                                            | 3           |
| <b>(2) SEARCH STRATEGY AND SCREENING INFORMATION</b><br><ul style="list-style-type: none"> <li>• eTable 3. Search strategy for Embase and PubMed databases.</li> </ul>                                                                                                                                                                                                                                                                                                                                                                                                                                                                                                                                                                                                                                                                                                                                                                                                                                                                                                                              | 7           |
| <b>(3) FULL-TEXT ARTICLES EXCLUDED</b><br><ul style="list-style-type: none"> <li>• eTable 4. Full-text articles excluded with reasons (n=135).</li> </ul>                                                                                                                                                                                                                                                                                                                                                                                                                                                                                                                                                                                                                                                                                                                                                                                                                                                                                                                                           | 9           |
| <b>(4) ADJUSTMENT FACTORS, QUALITY SCORING SYSTEM, AND LEAVE-ONE-OUT ANALYSIS</b><br><ul style="list-style-type: none"> <li>• eTable 5. Quality score system and adjustment factor descriptions. For categories where the data are missing, 1 point was subtracted (score = -1). The quality scores were categorized as low (<math>\leq 6</math> points), medium (7 points), and high (<math>\geq 8</math> points).</li> <li>• eTable 6. Pooled hazard ratio by quality grouping (low-quality, medium-quality, and high-quality). The first row shows the pooled hazard ratios when including all causal effects that make up the quality score. Subsequent rows show the pooled hazard ratios when one of the adjustment factors are omitted from the quality score calculation. For example, the “Age” row shows the quality subgroups without consideration of adjustment for age. For each row, the quality score cut-offs were the same (low = <math>\leq 6</math> points; medium = 7 points; high = <math>\geq 8</math> points) and not changed to have similarly sized subgroups.</li> </ul> | 21          |
| <b>(5) PRISMA 2020 CHECKLIST</b><br><ul style="list-style-type: none"> <li>• eTable 7. PRISMA 2020 Checklist.</li> </ul>                                                                                                                                                                                                                                                                                                                                                                                                                                                                                                                                                                                                                                                                                                                                                                                                                                                                                                                                                                            | 24          |
| <b>(6) COMPARISON CHARACTERISTICS</b><br><ul style="list-style-type: none"> <li>• eTable 8. Comparison characteristics (39 studies, 85 comparisons).</li> <li>• eTable 9. Quality scoring for adjustment in individual studies. Adjusted = 1 point; not adjusted = 0 points; not reported or unclear = -1 point. The quality scores were categorized as low (<math>\leq 6</math> points), medium (7 points), and high (<math>\geq 8</math> points).</li> </ul>                                                                                                                                                                                                                                                                                                                                                                                                                                                                                                                                                                                                                                      | 28          |
| <b>(7) SUBGROUP ANALYSES BY COMPARISON CHARACTERISTICS</b><br><ul style="list-style-type: none"> <li>• eTable 10. Results of subgroup analyses of comparisons by various characteristics. The significance p-value shows whether there is a significant difference between items in each subgroup.</li> </ul>                                                                                                                                                                                                                                                                                                                                                                                                                                                                                                                                                                                                                                                                                                                                                                                       | 41          |
| <b>(8) POST-HOC AND EXPLORATORY ANALYSES</b><br><ul style="list-style-type: none"> <li>• eFigure 2. Forest plot of pooled overall survival hazard ratios in five adjustment score groups: lowest-quality (<math>\leq 4</math> points), low-quality (5-6 points), medium-quality (7 points), high-quality (8 points), and highest-quality (<math>\geq 9</math> points).</li> <li>• eFigure 3. Forest plot of pooled overall survival hazard ratios focusing on comparisons that stated their aim as estimating the trial effect (n=32) and grouped by low-quality (<math>\leq 7</math> points), medium-quality (8 points), and high-quality (<math>\geq 9</math> points) adjustment scores.</li> </ul>                                                                                                                                                                                                                                                                                                                                                                                               | 43          |
| <b>(9) FUNNEL PLOT</b><br><ul style="list-style-type: none"> <li>• eFigure 4. Funnel plot showing asymmetry and suggesting possible publication bias with original studies (dark circles) and</li> </ul>                                                                                                                                                                                                                                                                                                                                                                                                                                                                                                                                                                                                                                                                                                                                                                                                                                                                                            | 47          |

|                                                                                                                                                                                                                                                                      |  |
|----------------------------------------------------------------------------------------------------------------------------------------------------------------------------------------------------------------------------------------------------------------------|--|
| 30 imputed missing studies (white circles) using the trim-and-fill method. The original pooled hazard ratio for overall survival is 0.76 (95% CI, 0.69-0.82). The pooled hazard ratio for overall survival with imputed missing studies is 0.94 (95% CI, 0.86-1.03). |  |
|----------------------------------------------------------------------------------------------------------------------------------------------------------------------------------------------------------------------------------------------------------------------|--|

4  
5

6 (1) DEFINING THE “TRIAL EFFECT”

7 While the magnitude of the treatment effect depends on the efficacy of the experimental drug (and determining this is the  
8 focus of all drug trials), it is not clear what factors might contribute to the “participation effect.” Based on a review of the  
9 literature and our own discussions, we assumed several mechanisms might cause participation effects (eFigure 1). First,  
10 there are protocol effects, which can be represented by the “monitoring effect” node (i.e. extra monitoring of adverse  
11 effects in trials for patients leads to better outcomes) and the “physician behaviour” node (i.e. physicians are more  
12 attentive to patients on trials), which are the differences in delivery of interventions because of trial protocol adherence  
13 (e.g. improved physician adherence to guidelines and standards of care). Second, there are placebo/nocebo effects,  
14 represented by the “patient expectation” and “patient behaviour” nodes. These include psychological benefits/harms to  
15 patients from awareness of trial participation, possible changes in mental outlook, better adherence to medication on trial,  
16 better self-care on trial, and other health behaviours. Third, there are care effects (“more attention, testing, time with  
17 physicians”), which are incidental differences in care of groups that may be related to increased access to healthcare  
18 services, including clinicians and nursing staff, better screening, and access to diagnostic services. eTable 1 defines the  
19 trial effect and the participation effect and separates it into different components.  
20

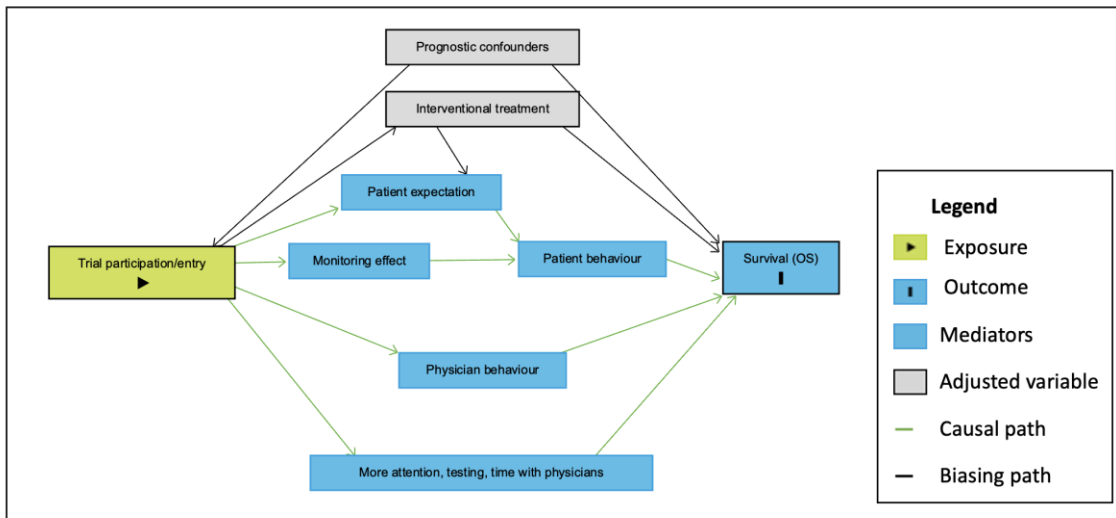

21 eFigure 1. Directed Acyclic Graph (DAG) showing our definition of the participation effect (based on blue  
22 mediators) that excludes the experimental treatment or prognostic confounders.<sup>1</sup>  
23

24

**eTable 1. Term definitions to describe the different reasons why trial participant and routine care patient outcomes may differ. These could be attributed to a participation effect, trial effect, or observed differences in general.**

| Term                        | Definition                                                                                                                                                                                                                                                                                                                                                  | Components                                                                                                                                                                                                                                                                                                                                                                                                                                                                                                                                                                                                                                                                                                                                                                                                                                                      |
|-----------------------------|-------------------------------------------------------------------------------------------------------------------------------------------------------------------------------------------------------------------------------------------------------------------------------------------------------------------------------------------------------------|-----------------------------------------------------------------------------------------------------------------------------------------------------------------------------------------------------------------------------------------------------------------------------------------------------------------------------------------------------------------------------------------------------------------------------------------------------------------------------------------------------------------------------------------------------------------------------------------------------------------------------------------------------------------------------------------------------------------------------------------------------------------------------------------------------------------------------------------------------------------|
| <b>Participation effect</b> | Benefit (indirect/collateral) from trial participation due to differences in outcomes that are unrelated to receiving an investigational drug, unrelated to confounding differences between groups, and unrelated to differences in measurement. The effect can include the protocol effect, the placebo effect, the care effect, and the Hawthorne effect. | <p><b>Protocol effect:</b> differences in delivery of interventions because of trial protocol adherence (related to mediator—<i>physician compliance</i>)</p> <p><b>Placebo effect:</b> psychological benefits for patients from awareness of trial participation (related to mediators—<i>patient expectation</i> and <i>patient compliance</i>)</p> <p><b>Care effect:</b> incidental differences in care of trial and routine care groups (related to mediator—<i>more attention, testing, time with physicians</i>)</p> <p><b>Hawthorne effect:</b> changes in patient or clinical behaviour because patients know they are being observed in a trial (related to mediators—<i>monitoring effect, patient expectation, and patient compliance</i>). Patient compliance includes better self-care, protocol compliance, and overall improved behaviours.</p> |
| <b>Trial effect</b>         | Benefit from participating in drug trials because of a) more time with physicians or medical testing and attention (i.e. participation effect) and b) access to experimental treatments (i.e. treatment effect).                                                                                                                                            | <p><b>Participation effect:</b> defined above</p> <p><b>Treatment effect:</b> benefit resulting from access to experimental treatments, which could influence patient expectation (mediator) as well as overall survival time (outcome).</p>                                                                                                                                                                                                                                                                                                                                                                                                                                                                                                                                                                                                                    |
| <b>Observed differences</b> | Overall differences in outcomes between trial participants and routine care patients. Differences can be attributed to: a) access to experimental treatments (i.e. treatment effect), b) more time with physicians or medical testing and attention                                                                                                         | <b>Trial effect (i.e. participation effect and treatment effect):</b> defined above                                                                                                                                                                                                                                                                                                                                                                                                                                                                                                                                                                                                                                                                                                                                                                             |

|  |                                                                                                                                                                                                                                                                                                                                      |                                                                                                                                                                                                                                                                                                                                                                |
|--|--------------------------------------------------------------------------------------------------------------------------------------------------------------------------------------------------------------------------------------------------------------------------------------------------------------------------------------|----------------------------------------------------------------------------------------------------------------------------------------------------------------------------------------------------------------------------------------------------------------------------------------------------------------------------------------------------------------|
|  | (i.e. participant effect), c) confounding of baseline characteristics (e.g. sampling bias where recruited trial participants are healthier compared to routine care patient populations), and d) differences in outcome measurement (e.g. differences in tumour assessment frequencies or patient reporting practices). <sup>2</sup> | <b>Confounding:</b> confounding or sampling biases (e.g. recruited trial participants are healthier compared to routine care patients) result from differences in the distribution of important prognostic factors between the trial participants and the control groups, often because of strict trial eligibility criteria or access to clinical trial sites |
|  |                                                                                                                                                                                                                                                                                                                                      | • Differences in outcome measurement (d)                                                                                                                                                                                                                                                                                                                       |

25  
26  
27  
28  
29  
30  
31  
32

Beyond the trial effects, differences between trial participants and routine care patients could be artifactual, the result of confounding or sampling biases (e.g. recruited trial participants are healthier compared to routine care patients) and measurement errors that inevitably bedevil observational research. Confounding results from differences in the distribution of important prognostic factors between the trial participants and the control groups, often because of strict trial eligibility criteria or access to clinical trial sites.

**eTable 2. Prognostic confounders relevant to observing trial effects with definitions and examples.**

| Prognostic confounder category     | Definition                                                                                               | Examples                                                                                                                                                                                                                                                             |
|------------------------------------|----------------------------------------------------------------------------------------------------------|----------------------------------------------------------------------------------------------------------------------------------------------------------------------------------------------------------------------------------------------------------------------|
| <b>Demographic factors</b>         | Characteristics relevant to patients.                                                                    | <ul style="list-style-type: none"> <li>• Age, sex, race/ethnicity</li> <li>• For example, an older patient may be less likely to be eligible for a trial and their age would also impact their overall survival time.</li> </ul>                                     |
| <b>Pre-existing illnesses</b>      | Measures or characteristics that indicate multiple diseases.                                             | <ul style="list-style-type: none"> <li>• Comorbidities</li> <li>• For example, a patient with severe cardiovascular disease may not be eligible to participate in trials and the presence of more diseases would also impact their overall survival time.</li> </ul> |
| <b>Cancer-specific variables</b>   | Characteristics related to a patient's cancer that can affect both their trial eligibility and survival. | <ul style="list-style-type: none"> <li>• Performance status, histology, stage</li> <li>• For example, a patient's cancer stage impacts both their trial eligibility and their overall survival.</li> </ul>                                                           |
| <b>Pre-trial treatment factors</b> | Variables that relate to previously used treatment regimens.                                             | <ul style="list-style-type: none"> <li>• Adjuvant therapies, surgical status</li> <li>• For example, whether a patient previously had surgery to remove a tumour may impact both trial eligibility and overall survival time.</li> </ul>                             |

33

34 Measurement errors include the Hawthorne effect (represented by “monitoring effect”, “patient expectation”, and “patient  
35 behaviour” nodes in eFigure 1), which are changes in patient or clinician behaviours in response to being observed (e.g.  
36 trial participants might be motivated to please those who monitor them). However, since we are focused on overall  
37 survival, measurement errors are less applicable as they would be for progression-free survival or quality of life outcomes.  
38 We set out to understand how trial participation may influence outcomes like quality of life, but studies did not measure  
39 these outcomes, so we decided to focus on differences in overall survival time because it is the outcome most found in  
40 the reviewed literature and because it is less susceptible to measurement errors.

41  
42

### 43 **References**

- 44 1. Textor J, Hardt J, Knüppel S. DAGitty: A Graphical Tool for Analyzing Causal Diagrams. *Epidemiology*. 2011;22(5):745.  
45 doi:10.1097/EDE.0b013e318225c2be
- 46 2. Peppercorn JM, Weeks JC, Cook EF, Joffe S. Comparison of outcomes in cancer patients treated within and outside  
47 clinical trials: conceptual framework and structured review. *The Lancet*. 2004;363(9405):263-270. doi:10.1016/S0140-  
48 6736(03)15383-4

49  
50  
51

## (2) SEARCH STRATEGY AND SCREENING INFORMATION

eTable 3. Search strategy for Embase and PubMed databases.

| Database      | Search Strategy                                                                                                                                                                                                                                                                                                                                                                                                                                                                                                                                                                                                                                                                                                                                                                                                                                                                                                                                                                                                    |
|---------------|--------------------------------------------------------------------------------------------------------------------------------------------------------------------------------------------------------------------------------------------------------------------------------------------------------------------------------------------------------------------------------------------------------------------------------------------------------------------------------------------------------------------------------------------------------------------------------------------------------------------------------------------------------------------------------------------------------------------------------------------------------------------------------------------------------------------------------------------------------------------------------------------------------------------------------------------------------------------------------------------------------------------|
| <b>Embase</b> | <p>"trial effect*".tw</p> <p><b>OR</b></p> <p>((neoplasm.sh OR neoplastic.tw OR carcinoma.tw OR tumo?r*.tw OR cancer*.tw OR oncolog*.tw)</p> <p><b>AND</b></p> <p>("clinical trials".sh OR randomized.tw OR randomised.tw OR nonrandomized.tw OR nonrandomised.tw OR controlled.tw))</p> <p><b>AND</b></p> <p>(cohort.tw OR case-control.tw OR "patient registry".tw OR quasiexperiment*.tw OR quasi-experiment*.tw OR "natural experiment*".tw OR matching.tw OR "historical control*".tw OR "wait list control".tw OR "waitlist control".tw OR "retrospective cohort*".tw OR "three arm".tw)</p> <p><b>AND</b></p> <p>("trial participa*".tw OR nonparticipa*.tw OR non-participa*.tw OR non-trial.tw OR nontrial.tw OR "not enrolled".tw OR "non enrol*".tw OR "enrol*".tw OR "non-treatment*".tw OR "standard care".tw OR "usual care".tw OR off-protocol.tw OR "participation bias".tw OR hawthorne.tw OR "care effect*".tw OR "enrollment effect".tw OR "trial benefit*".tw OR "inclusion benefit*".tw))</p> |
| <b>PubMed</b> | <p>"trial effect*"[tw]</p> <p><b>OR</b></p> <p>((("neoplasms"[mesh] OR neoplastic[tw] OR carcinoma[tw] OR tumour*[tw] OR tumor*[tw] OR cancer*[tw] OR oncolog*[tw])</p> <p><b>AND</b></p> <p>("clinical trials as topic"[mesh] OR randomized[tw] OR randomised[tw] OR nonrandomized[tw] OR nonrandomised[tw] OR controlled[tw]))</p> <p><b>AND</b></p> <p>(cohort[tw] OR case-control[tw] OR "patient registry"[tw] OR quasiexperiment*[tw] OR quasi-experiment*[tw] OR "natural experiment*"[tw] OR matched[tw] OR matching[tw] OR "historical control*"[tw])</p>                                                                                                                                                                                                                                                                                                                                                                                                                                                 |

OR “wait list control”[tw] OR “waitlist control”[tw] OR “retrospective cohort”[tw] OR “three arm”[tw] OR “medical record”[tw] OR “intervention study”[tw])

**AND**

(“trial participa”[tw] OR nonparticipa\*[tw] OR non-participa\*[tw] OR non-trial[tw] OR nontrial[tw] OR refuse\*[tw] OR “not enrolled”[tw] OR “non enrol”[tw] OR “enrol”[tw] OR eligibility[tw] OR “non-treatment”[tw] OR “standard care”[tw] OR “usual care”[tw] OR off-protocol[tw] OR “participation bias”[tw] OR hawthorne[tw] OR “care effect”[tw] OR “enrollment effect”[tw] OR “trial benefit”[tw] OR “inclusion benefit”[tw]))

53  
54



55 (3) FULL-TEXT ARTICLES EXCLUDED

56

**eTable 4.** Full-text articles excluded with reasons (n = 135).

| Reason                               | References |
|--------------------------------------|------------|
| Wrong outcome (n = 37)               | 1–37       |
| Published before 2000 (n = 31)       | 38–68      |
| Wrong study design (n = 26)          | 69–94      |
| Conference abstract (n = 21)         | 95–115     |
| Wrong intervention (n = 9)           | 116–124    |
| Wrong patient population (n = 7)     | 125–131    |
| Systematic/literature review (n = 4) | 132–135    |

57

58 **References**

- 59 1. Algra AM, Rothwell PM. Effects of regular aspirin on long-term cancer incidence and metastasis: a systematic comparison of evidence from  
60 observational studies versus randomised trials. *The Lancet Oncology*. 2012;13(5):518-527. doi:10.1016/S1470-2045(12)70112-2
- 61 2. Andersson Y, Bergkvist L, Frisell J, de Boniface J. Do clinical trials truly mirror their target population? An external validity analysis of national  
62 register versus trial data from the Swedish prospective SENOMIC trial on sentinel node micrometastases in breast cancer. *Breast Cancer Res  
63 Treat*. 2019;177(2):469-475. doi:10.1007/s10549-019-05328-3
- 64 3. Augustin A, Le Gouill S, Gressin R, et al. Survival benefit of mantle cell lymphoma patients enrolled in clinical trials; a joint study from the  
65 LYSA group and French cancer registries. *J Cancer Res Clin Oncol*. 2018;144(4):629-635. doi:10.1007/s00432-017-2529-9
- 66 4. Bertelli G, Drews F, Lutchman-Singh K. Bevacizumab for Ovarian Cancer at High Risk of Progression: Reproducibility of Trial Results in 'Real-  
67 world' Patients. *Anticancer Research*. 2016;36(9):4947-4950. doi:10.21873/anticancer.11061
- 68 5. Brennan M, Gass P, Häberle L, et al. The effect of participation in neoadjuvant clinical trials on outcomes in patients with early breast cancer.  
69 *Breast Cancer Research and Treatment*. 2018;171(3):747-758. doi:10.1007/s10549-018-4829-4
- 70 6. Burgers JA, Arance A, Ashcroft L, Hodgetts J, Lomax L, Thatcher N. Identical chemotherapy schedules given on and off trial protocol in small  
71 cell lung cancer: response and survival results. *British Journal of Cancer*. 2002;87(5):562-566. doi:10.1038/sj.bjc.6600433
- 72 7. Chen CI, Skingley P, Meyer RM. A comparison of elderly patients with aggressive histology lymphoma who were entered or not entered on to  
73 a randomized phase II trial. *Leukemia & Lymphoma*. 2000;38(3-4):327-334. doi:10.3109/10428190009087023
- 74 8. de Boniface J, Ahlgren J, Andersson Y, et al. The generalisability of randomised clinical trials: an interim external validity analysis of the  
75 ongoing SENOMAC trial in sentinel lymph node-positive breast cancer. *Breast Cancer Res Treat*. 2020;180(1):167-176. doi:10.1007/s10549-  
76 020-05537-1

- 77 9. De Placido S, Giuliano M, Schettini F, et al. Human epidermal growth factor receptor 2 dual blockade with trastuzumab and pertuzumab in real  
78 life: Italian clinical practice versus the CLEOPATRA trial results. *Breast*. 2018;38:86-91. doi:10.1016/j.breast.2017.12.012
- 79 10. Dix D, Aplenc R, Bowes L, et al. Impact of registration on clinical trials on infection risk in pediatric acute myeloid leukemia. *Int J Cancer*.  
80 2016;138(7):1785-1791. doi:10.1002/ijc.29905
- 81 11. Dowling AJ, Czaykowski PM, Krahn MD, Moore MJ, Tannock IF. Prostate specific antigen response to mitoxantrone and prednisone in  
82 patients with refractory prostate cancer: prognostic factors and generalizability of a multicenter trial to clinical practice. *Journal of Urology*.  
83 2000;163(5):1481-1485.
- 84 12. Enzinger AC, Zhang B, Weeks JC, Prigerson HG. Clinical trial participation as part of end-of-life cancer care: associations with medical care  
85 and quality of life near death. *J Pain Symptom Manage*. 2014;47(6):1078-1090. doi:10.1016/j.jpainsymman.2013.07.004
- 86 13. Estey EH, Thall PF, Giles FJ, et al. Gemtuzumab ozogamicin with or without interleukin 11 in patients 65 years of age or older with untreated  
87 acute myeloid leukemia and high-risk myelodysplastic syndrome: Comparison with idarubicin plus continuous-infusion, high-dose cytosine  
88 arabinoside. *Blood*. 2002;99(12):4343-4349. doi:10.1182/blood.V99.12.4343
- 89 14. Fraser J, Steele N, Al Zaman A, Yule A. Are patients in clinical trials representative of the general population? Dose intensity and toxicities  
90 associated with FE100C-D chemotherapy in a non-trial population of node positive breast cancer patients compared with PACS-01 trial group.  
91 *Eur J Cancer*. 2011;47(2):215-220. doi:10.1016/j.ejca.2010.10.001
- 92 15. Fujiya K, Tokunaga M, Nishiwaki N, et al. Feasibility of Laparoscopic Distal Gastrectomy for Stage I Gastric Cancer in Patients Outside of  
93 Clinical Trials. *J Gastrointest Surg*. 2018;22(10):1665-1671. doi:10.1007/s11605-018-3842-6
- 94 16. Gross CP, Filardo G, Mayne ST, Krumholz HM. The impact of socioeconomic status and race on trial participation for older women with breast  
95 cancer. *Cancer*. 2005;103(3):483-491. doi:10.1002/cncr.20792
- 96 17. Harter P, du Bois A, Schade-Brittinger C, et al. Non-enrollment of ovarian cancer patients in clinical trials: reasons and background. *Ann*  
97 *Oncol*. 2005;16(11):1801-1805. doi:10.1093/annonc/mdi367
- 98 18. Hehr T, Classen J, Schreck U, Glocker S, Bamberg M, Budach W. Hyperfractionated accelerated radiotherapy alone and with concomitant  
99 chemotherapy to the head and neck: treated within and outside of randomized clinical trials. *International Journal of Radiation*  
100 *Oncology\*Biological\*Physics*. 2004;58(5):1424-1430. doi:10.1016/j.ijrobp.2003.08.036
- 101 19. Janson M, Edlund G, Kressner U, et al. Analysis of patient selection and external validity in the Swedish contribution to the COLOR trial. *Surg*  
102 *Endosc*. 2009;23(8):1764-1769. doi:10.1007/s00464-008-0203-7
- 103 20. Julian-Reynier C, Genève J, Dalenc F, et al. Assessment of Care by Breast Cancer Patients Participating or Not Participating in a Randomized  
104 Controlled Trial: A Report With the Patients' Committee for Clinical Trials of the Ligue Nationale Contre le Cancer. *Journal of Clinical*  
105 *Oncology*. 2007;25(21):3038-3044. doi:10.1200/JCO.2006.08.9367

- 106 21. Koo KC, Lee JS, Kim JW, et al. Impact of clinical trial participation on survival in patients with castration-resistant prostate cancer: a multi-  
107 center analysis. *BMC Cancer*. 2018;18(1):468. doi:10.1186/s12885-018-4390-x
- 108 22. Koschmann C, Thomson B, Hawkins DS. No evidence of a trial effect in newly diagnosed pediatric acute lymphoblastic leukemia. *Archives of*  
109 *Pediatrics and Adolescent Medicine*. 2010;164(3):214-217. doi:10.1001/archpediatrics.2009.282
- 110 23. Kuo SH, Yang CH, Yu CJ, Hsu C, Cheng AL, Yang PC. Survival of stage IIIB/IV non-small cell lung cancer patients who received  
111 chemotherapy but did not participate in clinical trials. *Lung Cancer*. 2005;48(2):275-280. doi:10.1016/j.lungcan.2004.10.004
- 112 24. Mandelblatt JS, Makgoeng SB, Luta G, et al. A planned, prospective comparison of short-term quality of life outcomes among older patients  
113 with breast cancer treated with standard chemotherapy in a randomized clinical trial vs. an observational study: CALGB #49907 and #369901.  
114 *Journal of Geriatric Oncology*. 2013;4(4):353-361. doi:10.1016/j.jgo.2013.05.004
- 115 25. McGrath-Lone L, Ward H, Schoenborn C, Day S. The effects of cancer research participation on patient experience: a mixed-methods  
116 analysis. *European Journal of Cancer Care*. 2016;25(6):1056-1064. doi:10.1111/ecc.12336
- 117 26. Mengis C, Aebi S, Tobler A, Dähler W, Fey MF. Assessment of differences in patient populations selected for excluded from participation in  
118 clinical phase III acute myelogenous leukemia trials. *J Clin Oncol*. 2003;21(21):3933-3939. doi:10.1200/jco.2003.03.186
- 119 27. Mitchell AP, Harrison MR, Walker MS, George DJ, Abernethy AP, Hirsch BR. Clinical Trial Participants With Metastatic Renal Cell Carcinoma  
120 Differ From Patients Treated in Real-World Practice. *J Oncol Pract*. 2015;11(6):491-497. doi:10.1200/jop.2015.004929
- 121 28. Moke DJ, Oberley MJ, Bhojwani D, Parekh C, Orgel E. Association of clinical trial enrollment and survival using contemporary therapy for  
122 pediatric acute lymphoblastic leukemia. *Pediatr Blood Cancer*. 2018;65(2). doi:10.1002/pbc.26788
- 123 29. Østgård LS, Nørgaard M, Sengeløv H, et al. Improved outcome in acute myeloid leukemia patients enrolled in clinical trials: A national  
124 population-based cohort study of Danish intensive chemotherapy patients. *Oncotarget*. 2016;7(44):72044-72056.  
125 doi:10.18632/oncotarget.12495
- 126 30. Rajappa S, Gundeti S, Uppalapati S, et al. Is there a positive effect of participation on a clinical trial for patients with advanced non-small cell  
127 lung cancer. *Indian journal of cancer*. 2008;45(4):158-163. doi:10.4103/0019-509X.44664
- 128 31. Robinson WR, Ritter J, Rogers AS, Tedjarati S, Lieberenz C. Clinical Trial Participation Is Associated With Improved Outcome in Women With  
129 Ovarian Cancer. *International Journal of Gynecologic Cancer*. 2009;19(1):124-128. doi:10.1111/IGJ.0b013e31819a1ce8
- 130 32. Roy P, Vaughan Hudson G, Vaughan Hudson B, Esteve J, Swerdlow AJ. Long-term survival in Hodgkin's disease patients. *European Journal*  
131 *of Cancer*. 2000;36(3):384-389. doi:10.1016/S0959-8049(99)00267-1
- 132 33. Sorbye H, Pfeiffer P, Cavalli-Björkman N, et al. Clinical trial enrollment, patient characteristics, and survival differences in prospectively  
133 registered metastatic colorectal cancer patients. *Cancer*. 2009;115(20):4679-4687. doi:10.1002/cncr.24527

- 134 34. Svensson J, Andersson E, Persson U, Edeklng T, Ovanfors A, Ahlgren G. Value of treatment in clinical trials versus the real world: the case of  
135 abiraterone acetate (Zytiga) for postchemotherapy metastatic castration-resistant prostate cancer patients in Sweden. *Scandinavian Journal*  
136 *of Urology*. 2016;50(4):286-291. doi:10.3109/21681805.2016.1172254
- 137 35. Thompson CA, Hugo SE, Swetz KM, et al. End-of-life care in a population-based cohort of cancer patients: clinical trial participation versus  
138 standard of care. *BMJ Support Palliat Care*. 2013;3(2):181-187. doi:10.1136/bmjspcare-2012-000295
- 139 36. van der Biessen DA, Oldenmenger WH, van der Helm PG, et al. Self-reported quality of life and hope in phase-I trial participants: An  
140 observational prospective cohort study. *Eur J Cancer Care (Engl)*. 2018;27(6):e12908. doi:10.1111/ecc.12908
- 141 37. Yennurajalingam S, Kang JH, Cheng HY, et al. Characteristics of Advanced Cancer Patients With Cancer-Related Fatigue Enrolled in Clinical  
142 Trials and Patients Referred to Outpatient Palliative Care Clinics. *Journal of Pain and Symptom Management*. 2013;45(3):534-541.  
143 doi:10.1016/j.jpainsymman.2012.02.013
- 144 38. Akaza H, Hinotsu S, Aso Y, Kakizoe T, Koiso K. Bacillus Calmette-Guérin treatment of existing papillary bladder cancer and carcinoma in situ  
145 of the bladder. Four-year results. The Bladder Cancer BCG Study Group. *Cancer*. 1995;75(2):552-559. doi:10.1002/1097-  
146 0142(19950115)75:2<552::aid-cnrcr2820750219>3.0.co;2-h
- 147 39. Antman K, Amato D, Wood W, et al. Selection bias in clinical trials. *J Clin Oncol*. 1985;3(8):1142-1147. doi:10.1200/JCO.1985.3.8.1142
- 148 40. Balmukhanov SB, Beisebaev AA, Aitkoolova ZI, et al. Intratumoral and parametrial infusion of metronidazole in the radiotherapy of uterine  
149 cervix cancer: Preliminary report. *International Journal of Radiation Oncology\*Biophysics\*Physics*. 1989;16(4):1061-1063. doi:10.1016/0360-  
150 3016(89)90916-4
- 151 41. Berglund G, Bolund C, Gustafsson UL, Sjöden PO. Is the wish to participate in a cancer rehabilitation program an indicator of the need?  
152 Comparisons of participants and non-participants in a randomized study. *Psycho-Oncology*. 1997;6(1):35-46. doi:10.1002/(SICI)1099-  
153 1611(199703)6:1<35::AID-PON241>3.0.CO;2-J
- 154 42. Bergmann JF, Chassany O, Gandiol J, et al. A randomised clinical trial of the effect of informed consent on the analgesic activity of placebo  
155 and naproxen in cancer pain. *Clinical Trials and Meta-Analysis*. 1994;29(1):41-47.
- 156 43. Bertelsen K. Protocol allocation and exclusion in two Danish randomised trials in ovarian cancer. *British Journal of Cancer*. 1991;64(6):1172-  
157 1176. doi:10.1038/bjc.1991.485
- 158 44. Blichert-Toft M, Brincker H, Andersen JA, et al. A Danish Randomized Trial Comparing Breast-Preserving Therapy with Mastectomy in  
159 Mammary Carcinoma: Preliminary results. *Acta Oncologica*. 1988;27(6):671-677. doi:10.3109/02841868809091767
- 160 45. Cottin V, Arpin D, Lasset C, et al. Small-cell lung cancer: Patients included in clinical trials are not representative of the patient population as a  
161 whole. *Annals of Oncology*. 1999;10(7):809-816. doi:10.1023/A:1008399831512

- 162 46. Creutzig U, Ritter J, Zimmermann M, Schellong G. Does cranial irradiation reduce the risk for bone marrow relapse in acute myelogenous  
163 leukemia? Unexpected results of the Childhood Acute Myelogenous Leukemia Study BFM-87. *Journal of Clinical Oncology*. 1993;11(2):279-  
164 286. doi:10.1200/JCO.1993.11.2.279
- 165 47. Dahlberg M, Glimelius B, Pählman L. Improved survival and reduction in local failure rates after preoperative radiotherapy: evidence for the  
166 generalizability of the results of Swedish Rectal Cancer Trial. *Annals of Surgery*. 1999;229(4):493-497. doi:10.1097/00000658-199904000-  
167 00007
- 168 48. Davis S, Wright PW, Schulman SF. Participants in prospective, randomized clinical trials for resected non-small cell lung cancer have  
169 improved survival compared with nonparticipants in such trials. *Cancer*. 1985;56(7):1710-1718. doi:10.1002/1097-  
170 0142%2819851001%2956:7%3C1710::AID-CNCR2820560741%3E3.0.CO;2-T
- 171 49. Diehl LF, Perry DJ. A comparison of randomized concurrent control groups with matched historical control groups: are historical controls valid?  
172 *Journal of Clinical Oncology: Official Journal of the American Society of Clinical Oncology*. 1986;4(7):1114-1120.  
173 doi:10.1200/JCO.1986.4.7.1114
- 174 50. Edsmyr F, Esposti PL, Johansson B, Strindberg B. Clinical experimental randomized study of 2.6-cis-diphenylhexamethylcyclotetrasiloxane  
175 and estramustine-17-phosphate in the treatment of prostatic carcinoma. *The Journal of Urology*. 1978;120(6):705-707. doi:10.1016/s0022-  
176 5347(17)57336-x
- 177 51. Feuer EJ, Frey CM, Brawley OW, et al. After a treatment breakthrough: a comparison of trial and population-based data for advanced  
178 testicular cancer. *Journal of Clinical Oncology*. 1994;12(2):368-377. doi:10.1200/JCO.1994.12.2.368
- 179 52. Greil R, Holzner B, Kemmler G, et al. Retrospective assessment of quality of life and treatment outcome in patients with Hodgkin's disease  
180 from 1969 to 1994. *European Journal of Cancer*. 1999;35(5):698-706. doi:10.1016/S0959-8049%2899%2900025-8
- 181 53. Helsing M, Bergman B, Thaning L, Hero U. Quality of life and survival in patients with advanced non-small cell lung cancer receiving  
182 supportive care plus chemotherapy with carboplatin and etoposide or supportive care only. A multicentre randomised phase III trial. *European*  
183 *Journal of Cancer*. 1998;34(7):1036-1044. doi:10.1016/S0959-8049(97)10122-8
- 184 54. Hjorth M, Holmberg E, Rånåder S, Westin J, for the Myeloma Group of Western Sweden. Impact of active and passive exclusions on the  
185 results of a clinical trial in multiple myeloma. *British Journal of Haematology*. 1992;80(1):55-61. doi:10.1111/j.1365-2141.1992.tb06400.x
- 186 55. Karjalainen S, Palva I. Do treatment protocols improve end results? A study of survival of patients with multiple myeloma in Finland. *BMJ*  
187 (*Clinical research ed*). 1989;299(6707):1069-1072. doi:10.1136/bmj.299.6707.1069
- 188 56. Lennox EL, Stiller CA, Jones PH, Wilson LM. Nephroblastoma: treatment during 1970-3 and the effect on survival of inclusion in the first MRC  
189 trial. *BMJ*. 1979;2(6190):567-569. doi:10.1136/bmj.2.6190.567

- 190 57. Lidbrink E, Frisell J, Brandberg Y, Rosendahl I, Rutqvist LE. Nonattendance in the Stockholm mammography screening trial: Relative Mortality  
191 and reasons for nonattendance. *Breast Cancer Research and Treatment*. 1995;35(3):267-275. doi:10.1007/BF00665978
- 192 58. Link MP, Goorin AM, Horowitz M, et al. Adjuvant Chemotherapy of High-Grade Osteosarcoma of the Extremity: Updated Results of the Multi-  
193 Institutional Osteosarcoma Study. *Clinical Orthopaedics and Related Research*. 1991;NA;(270):8???14. doi:10.1097/00003086-199109000-  
194 00003
- 195 59. Marubini E, Mariani L, Salvadori B, et al. Results of a breast-cancer-surgery trial compared with observational data from routine practice. *The  
196 Lancet*. 1996;347(9007):1000-1003. doi:10.1016/S0140-6736(96)90145-2
- 197 60. Moertel CG, Childs DS, O'Fallon JR, Holbrook MA, Schutt AJ, Reitemeier RJ. Combined 5-fluorouracil and radiation therapy as a surgical  
198 adjuvant for poor prognosis gastric carcinoma. *Journal of Clinical Oncology*. 1984;2(11):1249-1254. doi:10.1200/JCO.1984.2.11.1249
- 199 61. Quoix E, Finkelstein H, Wolkove N, Kreisman H. Treatment of small-cell lung cancer on protocol: potential bias of results. *Journal of Clinical  
200 Oncology*. 1986;4(9):1314-1320. doi:10.1200/JCO.1986.4.9.1314
- 201 62. Schea RA, Perkins P, Allen PK, Komaki R, Cox JD. Limited-stage small-cell lung cancer: patient survival after combined chemotherapy and  
202 radiation therapy with and without treatment protocols. *Radiology*. 1995;197(3):859-862. doi:10.1148/radiology.197.3.7480770
- 203 63. Schmoor C, Olschewski M, Schumacher M. Randomised and non-randomised patients in clinical trials: experiences with comprehensive  
204 cohort studies. *Statistics in medicine*. 1996;15(3):263-271.
- 205 64. Stiller CA, Draper GJ. Treatment centre size, entry to trials, and survival in acute lymphoblastic leukaemia. *Archives of Disease in Childhood*.  
206 1989;64(5):657-661. doi:10.1136/adc.64.5.657
- 207 65. Sullivan MP, Fuller LM, Chen T, et al. Intergroup Hodgkin's disease in children study of stages I and II: a preliminary report. *Cancer Treatment  
208 Reports*. 1982;66(4):937-947.
- 209 66. Verdonck LF, van Putten WLJ, Hagenbeek A, et al. Comparison of CHOP Chemotherapy with Autologous Bone Marrow Transplantation for  
210 Slowly Responding Patients with Aggressive Non-Hodgkin's Lymphoma. *New England Journal of Medicine*. 1995;332(16):1045-1051.  
211 doi:10.1056/NEJM199504203321601
- 212 67. Wagner HP, Dingeldein-Bettler I, Berchthold W, et al. Childhood NHL in Switzerland: Incidence and Survival of 120 Study and 42 Non-Study  
213 Patients. *Medical and Pediatric Oncology*. 1995;24(5):281-286. doi:10.1002/mpo.2950240503
- 214 68. Ward LC, Fielding JW, Dunn JA, Kelly KA. The selection of cases for randomised trials: a registry survey of concurrent trial and non-trial  
215 patients. The British Stomach Cancer Group. *Br J Cancer*. 1992;66(5):943-950. doi:10.1038/bjc.1992.390
- 216 69. Aboda A, Taha W, Elkady A, Kanwar JR. A pilot study for randomized controlled trial of the benefits of a physical exercise program for cancer  
217 cachexia patients. *Journal of cachexia, sarcopenia and muscle*. 2018;9(1):211-. doi:10.1002/jcsm.12284

- 218 70. Abou-Alfa GK, Blanc JF, Miles S, et al. Phase II study of first-line trebananib plus sorafenib in patients with advanced hepatocellular  
219 carcinoma. *Oncologist*. 2017;22(7):780-e65. doi:10.1634/theoncologist.2017-0058
- 220 71. Apolone G, Bertetto O, Caraceni A, et al. Pain in cancer. An outcome research project to evaluate the epidemiology, the quality and the effects  
221 of pain treatment in cancer patients. *Health and Quality of Life Outcomes*. 2006;4. doi:10.1186/1477-7525-4-7
- 222 72. Banck-Petersen A, Olsen CK, Djurhuus SS, et al. The “Interval Walking in Colorectal Cancer” (I-WALK-CRC) study: design, methods and  
223 recruitment results of a randomized controlled feasibility trial. *Contemporary clinical trials communications*. 2018;9:143-150.  
224 doi:10.1016/j.conctc.2018.01.008
- 225 73. Biasoli I, Franchi-Rezgui P, Sibon D, et al. Analysis of factors influencing inclusion of 102 patients with stage III/IV Hodgkin's lymphoma in a  
226 randomized trial for first-line chemotherapy. *Annals of Oncology*. 2008;19(11):1915-1920. doi:10.1093/annonc/mdn391
- 227 74. Decensi A, Robertson C, Viale G, et al. A Randomized Trial of Low-Dose Tamoxifen on Breast Cancer Proliferation and Blood Estrogenic  
228 Biomarkers. *JNCI Journal of the National Cancer Institute*. 2003;95(11):779-790. doi:10.1093/jnci/95.11.779
- 229 75. Du Bois A, Rochon J, Lamparter C, Pfisterer J. Pattern of care and impact of participation in clinical studies on the outcome in ovarian cancer.  
230 *International Journal of Gynecologic Cancer*. 2005;15(2):183-191. doi:10.1136/ijgc-00009577-200503000-00001
- 231 76. Goebell PJ, Staehler M, Muller L, et al. Changes in Treatment Reality and Survival of Patients With Advanced Clear Cell Renal Cell  
232 Carcinoma - Analyses From the German Clinical RCC-Registry. *Clin Genitourin Cancer*. 2018;(no pagination). doi:10.1016/j.clgc.2018.06.006
- 233 77. Guerra CE, Kelly S, Redlinger C, Hernández P, Glanz K. Pancreatic Cancer Clinical Treatment Trials Accrual: A Closer Look at Participation  
234 Rates. *Am J Clin Oncol*. 2021;44(6):227-231. doi:10.1097/COC.0000000000000807
- 235 78. Harrison MR, Hirsch BR, George DJ, et al. Real-World Outcomes in Metastatic Renal Cell Carcinoma: Insights From a Joint Community-  
236 Academic Registry. *Journal of Oncology Practice*. 2014;10(2):e63-e72. doi:10.1200/JOP.2013.001180
- 237 79. Heng DYC, Choueiri TK, Rini BI, et al. Outcomes of patients with metastatic renal cell carcinoma that do not meet eligibility criteria for clinical  
238 trials. *Annals of Oncology*. 2014;25(1):149-154. doi:10.1093/annonc/mdt492
- 239 80. Janni W, Kiechle M, Sommer H, et al. Study participation improves treatment strategies and individual patient care in participating centers.  
240 *Anticancer Research*. 2006;26(5B):3661-3667.
- 241 81. Kwekkeboom KL, Abbott-Anderson K, Cherwin C, Roiland R, Serlin RC, Ward SE. Pilot randomized controlled trial of a patient-controlled  
242 cognitive-behavioral intervention for the pain, fatigue, and sleep disturbance symptom cluster in cancer. *Journal of pain and symptom  
243 management*. 2012;44(6):810-822. doi:10.1016/j.jpainsymman.2011.12.281

- 244 82. Marschner N, Staehler M, Müller L, et al. Survival of Patients With Advanced or Metastatic Renal Cell Carcinoma in Routine Practice Differs  
245 From That in Clinical Trials-Analyses From the German Clinical RCC Registry. *Clin Genitourin Cancer*. 2017;15(2):e209-e215.  
246 doi:10.1016/j.clgc.2016.08.022
- 247 83. Mascarenhas J, Hoffman R. A comprehensive review and analysis of the effect of ruxolitinib therapy on the survival of patients with  
248 myelofibrosis. *Blood*. 2013;121(24):4832-4837. doi:10.1182/blood-2013-02-482232
- 249 84. Meadows AT, Kramer S, Hopson R, Lustbader E, Jarrett P, Evans AE. Survival in Childhood Acute Lymphocytic Leukemia: Effect of Protocol  
250 and Place of Treatment. *Cancer Investigation*. 1983;1(1):49-55. doi:10.3109/07357908309040932
- 251 85. Nct. Understanding the Post-Surgical Non-Small Cell Lung Cancer Patient's Symptom Experience.  
252 <https://clinicaltrials.gov/show/NCT03724331>. Published online 2018. [https://www.cochranelibrary.com/central/doi/10.1002/central/CN-](https://www.cochranelibrary.com/central/doi/10.1002/central/CN-01918268/full)  
253 [01918268/full](https://www.cochranelibrary.com/central/doi/10.1002/central/CN-01918268/full)
- 254 86. Noronha V, Patil VM, Joshi A, et al. Epidermal growth factor receptor positive lung cancer: The nontrial scenario. *Indian J Cancer*.  
255 2017;54(1):132-135. doi:10.4103/0019-509x.219583
- 256 87. Rock K, McArdle O, Forde P, et al. A clinical review of treatment outcomes in glioblastoma multiforme--the validation in a non-trial population  
257 of the results of a randomised Phase III clinical trial: has a more radical approach improved survival? *British Journal of Radiology*.  
258 2012;85(1017):e729-33. doi:10.1259/bjr/83796755
- 259 88. Shmuel S, Yang JY, Thai S, Webster-Clark M, Lund JL. Assessing clinical trial effects on outcomes among pediatric and adolescent and young  
260 adult (AYA) patients with cancer. *Cancer*. 2021;127(4):648-649. doi:10.1002/cncr.33252
- 261 89. Shukuya T, Takamochi K, Sakurai H, et al. Efficacy of Adjuvant Chemotherapy With Tegafur-Uracil in Patients With Completely Resected,  
262 Node-Negative NSCLC-Real-World Data in the Era of Molecularly Targeted Agents and Immunotherapy. *JTO Clin Res Rep*.  
263 2022;3(5):100320. doi:10.1016/j.jtocrr.2022.100320
- 264 90. Socinski MA, Manikhas GM, Stroyakovsky DL, et al. A dose finding study of weekly and every-3-week nab-paclitaxel followed by carboplatin  
265 as first-line therapy in patients with advanced non-small cell lung cancer. *J Thorac Oncol*. 2010;5(6):852-861.  
266 doi:10.1097/JTO.0b013e3181d5e39e
- 267 91. Stein A, Petersen V, Schulze M, et al. Bevacizumab plus chemotherapy as first-line treatment for patients with metastatic colorectal cancer:  
268 Results from a large German community-based observational cohort study. *Acta Oncologica*. 2015;54(2):171-178.  
269 doi:10.3109/0284186X.2014.961649
- 270 92. Treweek S, Dryden R, McCowan C, Harrow A, Thompson AM. Do participants in adjuvant breast cancer trials reflect the breast cancer patient  
271 population? *Eur J Cancer*. 2015;51(8):907-914. doi:10.1016/j.ejca.2015.01.064



- 272 93. Unger JM, Blanke CD, Leblanc M, et al. Association of Patient Demographic Characteristics and Insurance Status with Survival in Cancer  
273 Randomized Clinical Trials with Positive Findings. *JAMA Netw Open*. 2020;3(4):e203842. doi:10.1001/jamanetworkopen.2020.3842
- 274 94. Wright AA, Cronin A, Milne DE, et al. Use and effectiveness of intraperitoneal chemotherapy for treatment of ovarian cancer. *J Clin Oncol*.  
275 2015;33(26):2841-2847. doi:10.1200/JCO.2015.61.4776
- 276 95. Ascierto PA, Chiarion Sileni V, Del Vecchio M, et al. The european ipilimumab expanded access programme (EAP): Efficacy and safety data  
277 from the Italian cohort of patients with pretreated, advanced melanoma. *Ann Oncol*. 2012;23(SUPPL. 9). doi:10.1093/annonc/mds404
- 278 96. Baba S, Sawaki M, Uemura Y, et al. A cohort study to evaluate the efficacy and safety of postoperative adjuvant therapy in HER2-positive  
279 elderly breast cancer patients (RESPECT-cohort study). *Cancer Res*. 2020;80(4). doi:10.1158/1538-7445.SABCS19-P3-14-02
- 280 97. Berger R, Ish-Shalom M, Maimon N, et al. Comparison between the outcome of metastatic RCC patients treated with sunitinib as part of  
281 clinical trials and matched nonparticipants receiving sunitinib as standard therapy. *J Clin Oncol*. 2013;31(15 SUPPL. 1).  
282 [http://meeting.ascopubs.org/cgi/content/abstract/31/15\\_suppl/e15597?sid=66f76291-44a4-4eb7-9975-45d04a25a720](http://meeting.ascopubs.org/cgi/content/abstract/31/15_suppl/e15597?sid=66f76291-44a4-4eb7-9975-45d04a25a720)
- 283 98. Cassidy RJ, Liu Y, Zhong J, Gillespie TW, Landry JC. Survival impact of neoadjuvant chemotherapy alone versus neoadjuvant chemoradiation  
284 therapy for patients with T2N1, T3N0, and T3N1 rectal adenocarcinomas. *International journal of radiation oncology biology physics*  
285 *Conference: 58th annual meeting of the american society for radiation oncology, ASTRO 2016 United states*. 2016;96(2 Supplement 1):E148.
- 286 99. Cathcart P, Van Der Meulen J, Emberton M. Can the findings of randomised clinical trials concerning the efficacy of prostate cancer therapy in  
287 men with early disease be replicated in national cancer registries? *European urology, supplements*. 2013;12(1):e181-.
- 288 100. Eduafo A., Metheny L., Driscoll J., et al. Patient selection bias limits the real world efficacy of randomized clinical trials in multiple myeloma.  
289 *Blood*. 2020;136(SUPPL 1):1-2. doi:10.1182/blood-2020-139856
- 290 101. Grande Pulido E, Castelo B, Fonseca PJ, et al. Efficacy and tolerability of sunitinib in patients with advanced thyroid cancer out of a trial: A  
291 Spanish multicenter cohort. *J Clin Oncol*. 2011;29(15 SUPPL. 1). [http://meeting.ascopubs.org/cgi/content/abstract/29/15-](http://meeting.ascopubs.org/cgi/content/abstract/29/15-suppl/e16024?sid=404fb8ff-8950-43f5-bcf-d2c47c08062d8)  
292 [suppl/e16024?sid=404fb8ff-8950-43f5-bcf-d2c47c08062d8](http://meeting.ascopubs.org/cgi/content/abstract/29/15-suppl/e16024?sid=404fb8ff-8950-43f5-bcf-d2c47c08062d8)
- 293 102. Harrison MR, George DJ, Walker MS, et al. Outcomes of “real world” treatment for metastatic renal cell carcinoma (mRCC). *J Clin Oncol*.  
294 2012;30(5 SUPPL. 1). <http://ovidsp.ovid.com/ovidweb.cgi?T=JS&PAGE=reference&D=emed13&NEWS=N&AN=71008688>
- 295 103. Introini C, Naselli A, Puppo P, Germinale F. Feasibility, safety and 1 year follow up of en bloc transurethral resection of bladder tumor  
296 compared to a matched cohort of patients submitted to standard tur. *Anticancer Research*. 2012;32(5):1906.
- 297 104. Joseph RW, Liu FX, Macahilig C, et al. Real-world utilization and patient outcomes associated with pembrolizumab in advanced melanoma in  
298 US academic centers and affiliated satellite clinics. *J Clin Oncol*. 2018;36(15 Supplement 1). doi:10.1200/JCO.2018.36.15-suppl.e21500

- 299 105. Marschner N, Potthoff K, Schnell R, et al. Overall survival of 4865 patients with metastatic solid tumours treated in German routine practice -  
300 Combined results from four prospective, multicentre cohort studies. *Oncology research and treatment*. 2016;39:43-. doi:10.1159/000449050
- 301 106. Merkhofer C, Eaton KD, Martins RG, Ramsey SD, Goulart BHL. Potential impact of clinical trial (CT) participation on survival of patients with  
302 metastatic non-small cell lung cancer (NSCLC). *J Clin Oncol*. 2019;37. doi:10.1200/JCO.2019.37.27-suppl.137
- 303 107. Narui K, Ohno S, Mukai H, et al. Overall survival of participants compared to non-participants in a randomized-controlled trial (SELECT BC):  
304 a prospective cohort study. *J Clin Oncol*. 2016;34. <https://www.cochranelibrary.com/central/doi/10.1002/central/CN-01780537/full>
- 305 108. Rousey S, Lassi KK, Wieczorek J, et al. Early use of home health care on health care utilization for patients with advanced lung cancer. *J Clin*  
306 *Oncol*. 2013;31(15 SUPPL. 1). [http://meeting.ascopubs.org/cgi/content/abstract/31/15\\_suppl/e19015?sid=ddb5fb2e-7dfe-43c6-8e9f-](http://meeting.ascopubs.org/cgi/content/abstract/31/15_suppl/e19015?sid=ddb5fb2e-7dfe-43c6-8e9f-d189bd78548f)  
307 [d189bd78548f](http://meeting.ascopubs.org/cgi/content/abstract/31/15_suppl/e19015?sid=ddb5fb2e-7dfe-43c6-8e9f-d189bd78548f)
- 308 109. Ryan S, Jamieson C, Shabaik A, et al. B cell concentration in high risk prostate cancer specimens after neoadjuvant rituximab. *Journal of*  
309 *Urology*. 2018;199(4 Supplement 1):e942.
- 310 110. Saito T, Sawaki M, Hozumi Y, et al. A randomized controlled trial of postoperative adjuvant therapy for elderly breast cancer patients:  
311 Comparison of health-related quality of life between clinical trial participants and decliners. *Cancer Res*. 2016;76(4 SUPPL. 1).  
312 doi:10.1158/1538-7445.SABCS15-P4-11-09
- 313 111. Sakurai H, Goto Y, Yoh K, et al. P1.17-04 Multicenter Observational Study of Node-Negative Non-Small Cell Lung Cancer Patients Who Are  
314 Excluded from a Clinical Trial. *J Thorac Oncol*. 2019;14(10 Supplement):S608-S609. doi:10.1016/j.jtho.2019.08.1278
- 315 112. Shacham Abulafia A, Shemesh S, Pasvolsky O, Vaxman J, Raanani P, Rozovski U. The impact of enrollment in clinical trials of patients with  
316 multiple myeloma. *Hemasphere*. 2019;3:982-.
- 317 113. Tini G, Sarocchi M, Sirello D, et al. Cardiovascular profile of oncologic patients scheduled to receive anti VEGF therapy and implications for  
318 the risk of cardiotoxicity. *Giornale Italiano di Cardiologia*. 2019;20(12 Supplement 1):101S.
- 319 114. Wagner LI, Toomey K, Ailawadhi S, et al. Clinical outcomes and health-related quality of life (HRQoL) among randomized clinical trial (RCT)-  
320 eligible and RCT-ineligible patients: results from the Connect® MM registry. *Hemasphere*. 2020;4:460-461.  
321 doi:10.1097/HS9.0000000000000404
- 322 115. Yin X., Davi R., Lamont E.B., et al. Phase Ib trial single-arm efficacy estimates via comparison to a historical clinical trial synthetic control arm.  
323 *Cancer Research*. 2022;82(12 Supplement). doi:10.1158/1538-7445.AM2022-1025
- 324 116. Bijker N, Peterse JL, Fentiman IS, et al. Effects of patient selection on the applicability of results from a randomised clinical trial (EORTC  
325 10853) investigating breast-conserving therapy for DCIS. *British Journal of Cancer*. 2002;87(6):615-620. doi:10.1038/sj.bjc.6600514

- 326 117. Boesen, Boesen SH, Frederiksen K, et al. Survival after a psychoeducational intervention for patients with cutaneous malignant melanoma: a  
327 replication study. *J Clin Oncol*. 2007;25(36):5698-5703. doi:10.1200/JCO.2007.10.8894
- 328 118. Boesen E, Boesen S, Christensen S, Johansen C. Comparison of participants and non-participants in a randomized psychosocial intervention  
329 study among patients with malignant melanoma. *Psychosomatics*. 2007;48(6):510-516. doi:10.1176/appi.psy.48.6.510
- 330 119. Dussel V, Orellana L, Soto N, et al. Feasibility of Conducting a Palliative Care Randomized Controlled Trial in Children With Advanced Cancer:  
331 assessment of the PediQUEST Study. *Journal of pain and symptom management*. 2015;49(6):1059-1069.  
332 doi:10.1016/j.jpainsymman.2014.12.010
- 333 120. Gilson MM, Diener-West M, Hawkins BS. Comparison of survival among eligible patients not enrolled versus enrolled in the Collaborative  
334 Ocular Melanoma Study (COMS) randomized trial of pre-enucleation radiation of large choroidal melanoma. *Ophthalmic Epidemiol*.  
335 2007;14(4):251-257. doi:10.1080/01658100701473275
- 336 121. Khera N, Majhail NS, Brazauskas R, et al. Comparison of Characteristics and Outcomes of Trial Participants and Nonparticipants: Example of  
337 Blood and Marrow Transplant Clinical Trials Network 0201 Trial. *Biology of Blood and Marrow Transplantation*. 2015;21(10):1815-1822.  
338 doi:10.1016/j.bbmt.2015.06.004
- 339 122. Martelli G, Boracchi P, Orenti A, et al. Axillary dissection versus no axillary dissection in older T1N0 breast cancer patients: 15-year results of  
340 trial and out-trial patients. *European Journal of Surgical Oncology*. 2014;40(7):805-812. doi:10.1016/j.ejso.2014.03.029
- 341 123. Morris EJA, Jordan C, Thomas JD, et al. Comparison of treatment and outcome information between a clinical trial and the National Cancer  
342 Data Repository. *British Journal of Surgery*. 2011;98(2):299-307. doi:10.1002/bjs.7295
- 343 124. Vis AN, Roemeling S, Reedijk AMJ, Otto SJ, Schröder FH. Overall Survival in the Intervention Arm of a Randomized Controlled Screening  
344 Trial for Prostate Cancer Compared with a Clinically Diagnosed Cohort. *European Urology*. 2008;53(1):91-98.  
345 doi:10.1016/j.eururo.2007.06.001
- 346 125. Aaltonen KJ, Ylikylä S, Tuulikki Joensuu J, et al. Efficacy and effectiveness of tumour necrosis factor inhibitors in the treatment of rheumatoid  
347 arthritis in randomized controlled trials and routine clinical practice. *Rheumatology (Oxford)*. 2017;56(5):725-735.  
348 doi:10.1093/rheumatology/kew467
- 349 126. Anveden A, Taube M, Peltonen M, et al. Long-term incidence of female-specific cancer after bariatric surgery or usual care in the Swedish  
350 Obese Subjects Study. *Gynecol Oncol*. 2017;145(2):224-229. doi:10.1016/j.ygyno.2017.02.036
- 351 127. Dallal CM, Brinton LA, Bauer DC, et al. Obesity-related hormones and endometrial cancer among postmenopausal women: a nested case-  
352 control study within the B~FIT cohort. *Endocr Relat Cancer*. 2013;20(1):151-160. doi:10.1530/erc-12-0229
- 353 128. Flasiński M, Scheibke K, Zimmermann M, et al. Low-dose cytarabine to prevent myeloid leukemia in children with Down syndrome: TMD  
354 Prevention 2007 study. *Blood Adv*. 2018;2(13):1532-1540. doi:10.1182/bloodadvances.2018018945

- 355 129. Flossmann E, Rothwell PM. Effect of aspirin on long-term risk of colorectal cancer: consistent evidence from randomised and observational  
356 studies. *The Lancet*. 2007;369(9573):1603-1613. doi:10.1016/S0140-6736(07)60747-8
- 357 130. Taube M, Peltonen M, Sjöholm K, et al. Association of Bariatric Surgery With Skin Cancer Incidence in Adults With Obesity: A Nonrandomized  
358 Controlled Trial. *JAMA Dermatol*. 2020;156(1):38-43. doi:10.1001/jamadermatol.2019.3240
- 359 131. Wang A, Aragaki AK, Tang JY, et al. Statin use and all-cancer survival: prospective results from the Women's Health Initiative. *Br J Cancer*.  
360 2016;115(1):129-135. doi:10.1038/bjc.2016.149
- 361 132. Braunholtz DA, Edwards SJL, Lilford RJ. Are randomized clinical trials good for us (in the short term)? Evidence for a "trial effect." *Journal of*  
362 *Clinical Epidemiology*. 2001;54(3):217-224. doi:10.1016/S0895-4356(00)00305-X
- 363 133. Mantarro S, Rossi M, Bonifazi M, et al. Risk of severe cardiotoxicity following treatment with trastuzumab: a meta-analysis of randomized and  
364 cohort studies of 29,000 women with breast cancer. *Internal and Emergency Medicine*. 2016;11(1):123-140. doi:10.1007/s11739-015-1362-x
- 365 134. Peppercorn JM, Weeks JC, Cook EF, Joffe S. Comparison of outcomes in cancer patients treated within and outside clinical trials:  
366 Conceptual framework and structured review. *Lancet*. 2004;363(9405):263-270. doi:10.1016/S0140-6736%2803%2915383-4
- 367 135. Vist GE, Bryant D, Somerville L, Birmingham T, Oxman AD. Outcomes of patients who participate in randomized controlled trials compared to  
368 similar patients receiving similar interventions who do not participate. *Cochrane Database of Systematic Reviews*. 2008;(3):MR000009.  
369 doi:10.1002/14651858.MR000009.pub4

370  
371

372 **(4) ADJUSTMENT FACTORS, QUALITY SCORING SYSTEM, AND LEAVE-ONE-OUT ANALYSIS**

373

374 Our quality scoring system was built inductively after extraction was initiated, using the aforementioned directed acyclic graph (DAG) as a  
 375 framework. In particular, during extraction, we identified items that various primary reports used to adjust in comparisons of trial participant and  
 376 routine care patient outcomes. From this, we created a list of recurring adjustment factors. We added other factors to this list, based on biases or  
 377 confounders captured in our DAG above.

378

**eTable 5. Quality score system and adjustment factor descriptions. For categories where the data are missing, 1 point was subtracted (score = -1). The quality scores were categorized as low (≤6 points), medium (7 points), and high (≥8 points).**

| Adjustment Factor Description                                                | Score |
|------------------------------------------------------------------------------|-------|
| Studies that account for age                                                 | 1     |
| Studies that do not account for age                                          | 0     |
| Studies that account for sex                                                 | 1     |
| Studies that do not account for sex                                          | 0     |
| Studies that account for race/ethnicity                                      | 1     |
| Studies that do not account for race/ethnicity                               | 0     |
| Studies that account for comorbidities                                       | 1     |
| Studies that do not account for comorbidities                                | 0     |
| Studies that account for stage                                               | 1     |
| Studies that do not account for stage                                        | 0     |
| Studies that account for histology                                           | 1     |
| Studies that do not account for histology                                    | 0     |
| Studies that account for performance status                                  | 1     |
| Studies that do not account for performance status                           | 0     |
| Studies that account for line of treatment                                   | 1     |
| Studies that do not account for line of treatment                            | 0     |
| Studies that accounted for trial eligibility                                 | 1     |
| Studies that did not account for trial eligibility                           | 0     |
| Studies in which the routine care group do not include trial refusers        | 1     |
| Studies in which the routine care group includes trial refusers <sup>a</sup> | 0     |
| Studies that accounted for treatment effect (same treatments)                | 1     |

|                                                                               |   |
|-------------------------------------------------------------------------------|---|
| Studies that did not account for treatment effect (different treatments)      | 0 |
| Studies that are conducted in a similar time period for comparison groups     | 1 |
| Studies that are not conducted in a similar time period for comparison groups | 0 |
| Studies that compare the routine care group to the same trial                 | 1 |
| Studies that compare the routine care group to multiple trials                | 0 |
| Studies that use registries for the source of routine care group data         | 1 |
| Studies that use medical records for the source of routine care group data    | 0 |
| Studies that account for the same trial and routine care group sources        | 1 |
| Studies that do not account for the same trial and routine care group sources | 0 |
| Studies with a large trial sample size ( $\geq 200$ ) <sup>b</sup>            | 1 |
| Studies with a small trial sample size ( $< 200$ )                            | 0 |

Cancer site was not included as an adjustment factor because all studies in our sample adjusted for same cancer type. However, this is an important adjustment factor to consider for a sample that does not all adjust for the same cancer site. <sup>a</sup> We examined whether studies included trial refusers in their routine care patient groups. The justification for this point allocation is that we might expect that including trial refusers in the routine care group would lead to increased differences between the groups because trial refusers might be less motivated to adhere to treatment schedules or medications. <sup>b</sup> Only the trial participant group sample size was considered, not the routine care group sample size. This could have led to more points for studies with small sample sizes in the routine care group and large sample sizes in the trial participant group and less points for studies with small sample sizes in the trial participant group but large sample sizes in the routine care group.

379

380

381

**eTable 6. Pooled hazard ratio by quality grouping (low-quality, medium-quality, and high-quality). The first row shows the pooled hazard ratios when including all causal effects that make up the quality score. Subsequent rows show the pooled hazard ratios when one of the adjustment factors are omitted from the quality score calculation. For example, the “Age” row shows the quality subgroups without consideration of adjustment for age. For each row, the quality score cut-offs were the same (low = ≤6 points; medium = 7 points; high = ≥8 points) and not changed to have similarly sized subgroups.**

| Leave out          | Low |      |           | Medium |      |           | High |      |           |
|--------------------|-----|------|-----------|--------|------|-----------|------|------|-----------|
|                    | N   | HR   | 95% CI    | N      | HR   | 95% CI    | N    | HR   | 95% CI    |
| None               | 35  | 0.64 | 0.58-0.72 | 24     | 0.85 | 0.73-0.98 | 26   | 0.91 | 0.80-1.05 |
| Age                | 57  | 0.68 | 0.62-0.75 | 17     | 0.97 | 0.80-1.17 | 11   | 0.98 | 0.89-1.09 |
| Sex                | 58  | 0.69 | 0.63-0.77 | 17     | 0.92 | 0.76-1.12 | 10   | 0.98 | 0.87-1.09 |
| Race/ethnicity     | 57  | 0.69 | 0.63-0.76 | 15     | 0.97 | 0.79-1.20 | 13   | 0.92 | 0.81-1.03 |
| Comorbidities      | 38  | 0.64 | 0.58-0.72 | 27     | 0.90 | 0.77-1.06 | 20   | 0.92 | 0.83-1.03 |
| Stage              | 55  | 0.69 | 0.63-0.77 | 17     | 0.88 | 0.73-1.06 | 13   | 0.97 | 0.88-1.07 |
| Histology          | 53  | 0.69 | 0.62-0.77 | 17     | 0.88 | 0.73-1.06 | 15   | 0.91 | 0.81-1.04 |
| Performance status | 37  | 0.64 | 0.58-0.72 | 27     | 0.91 | 0.77-1.06 | 21   | 0.89 | 0.79-1.01 |
| Line of treatment  | 38  | 0.65 | 0.59-0.72 | 28     | 0.91 | 0.79-1.07 | 19   | 0.89 | 0.78-1.00 |
| Eligibility        | 37  | 0.65 | 0.59-0.73 | 21     | 0.96 | 0.84-1.09 | 27   | 0.86 | 0.75-0.98 |
| Trial refusers     | 36  | 0.65 | 0.59-0.73 | 3      | 0.82 | 0.60-1.12 | 46   | 0.88 | 0.79-0.99 |
| Treatment          | 40  | 0.65 | 0.58-0.72 | 19     | 1.00 | 0.92-1.08 | 26   | 0.89 | 0.77-1.02 |
| Same timeframe     | 57  | 0.69 | 0.63-0.76 | 17     | 0.93 | 0.77-1.12 | 11   | 0.98 | 0.89-1.09 |
| Same trial         | 51  | 0.68 | 0.61-0.76 | 15     | 0.84 | 0.74-0.97 | 19   | 0.90 | 0.77-1.05 |
| Data source        | 55  | 0.70 | 0.63-0.77 | 17     | 0.83 | 0.68-1.01 | 13   | 0.99 | 0.92-1.08 |
| Group sources      | 42  | 0.66 | 0.60-0.73 | 24     | 0.90 | 0.78-1.03 | 19   | 0.94 | 0.79-1.12 |
| Sample size        | 45  | 0.68 | 0.61-0.75 | 28     | 0.90 | 0.76-1.07 | 12   | 1.00 | 0.92-1.09 |

382  
383  
384  
385  
386  
387  
388  
389  
390  
391

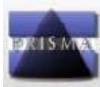

(5) eTable 7. PRISMA 2020 CHECKLIST

| Section/topic           | #   | Checklist item                                                                                                                                                                                                                                                                                       | Reported on page #                             |
|-------------------------|-----|------------------------------------------------------------------------------------------------------------------------------------------------------------------------------------------------------------------------------------------------------------------------------------------------------|------------------------------------------------|
| <b>TITLE</b>            |     |                                                                                                                                                                                                                                                                                                      |                                                |
| Title                   | 1   | Identify the report as a systematic review.                                                                                                                                                                                                                                                          | 1                                              |
| <b>ABSTRACT</b>         |     |                                                                                                                                                                                                                                                                                                      |                                                |
| Abstract                | 2   | See the PRISMA 2020 for Abstracts checklist.                                                                                                                                                                                                                                                         | 3                                              |
| <b>INTRODUCTION</b>     |     |                                                                                                                                                                                                                                                                                                      |                                                |
| Rationale               | 3   | Describe the rationale for the review in the context of existing knowledge.                                                                                                                                                                                                                          | 4                                              |
| Objectives              | 4   | Provide an explicit statement of the objective(s) or question(s) the review addresses.                                                                                                                                                                                                               | 4-5                                            |
| <b>METHODS</b>          |     |                                                                                                                                                                                                                                                                                                      |                                                |
| Eligibility criteria    | 5   | Specify the inclusion and exclusion criteria for the review and how studies were grouped for the syntheses.                                                                                                                                                                                          | 5-6                                            |
| Information sources     | 6   | Specify all databases, registers, websites, organisations, reference lists and other sources searched or consulted to identify studies. Specify the date when each source was last searched or consulted.                                                                                            | 5-6                                            |
| Search strategy         | 7   | Present the full search strategies for all databases, registers and websites, including any filters and limits used.                                                                                                                                                                                 | eTable 3                                       |
| Selection process       | 8   | Specify the methods used to decide whether a study met the inclusion criteria of the review, including how many reviewers screened each record and each report retrieved, whether they worked independently, and if applicable, details of automation tools used in the process.                     | 5-6 (and Supplement on Open Science Framework) |
| Data collection process | 9   | Specify the methods used to collect data from reports, including how many reviewers collected data from each report, whether they worked independently, any processes for obtaining or confirming data from study investigators, and if applicable, details of automation tools used in the process. | 6-7                                            |
| Data items              | 10a | List and define all outcomes for which data were sought. Specify whether all results that were compatible with each outcome domain in each study were sought (e.g. for all measures, time points, analyses), and if not, the methods used to decide which results to collect.                        | 6-7 (and Supplement on Open Science Framework) |



|                               |     |                                                                                                                                                                                                                                                                   |                                                |
|-------------------------------|-----|-------------------------------------------------------------------------------------------------------------------------------------------------------------------------------------------------------------------------------------------------------------------|------------------------------------------------|
|                               | 10b | List and define all other variables for which data were sought (e.g. participant and intervention characteristics, funding sources). Describe any assumptions made about any missing or unclear information.                                                      | 6-7 (and Supplement on Open Science Framework) |
| Study risk of bias assessment | 11  | Specify the methods used to assess risk of bias in the included studies, including details of the tool(s) used, how many reviewers assessed each study and whether they worked independently, and if applicable, details of automation tools used in the process. | 7                                              |
| Effect measures               | 12  | Specify for each outcome the effect measure(s) (e.g. risk ratio, mean difference) used in the synthesis or presentation of results.                                                                                                                               | 7                                              |
| Synthesis methods             | 13a | Describe the processes used to decide which studies were eligible for each synthesis (e.g. tabulating the study intervention characteristics and comparing against the planned groups for each synthesis (item #5)).                                              | N/A                                            |
|                               | 13b | Describe any methods required to prepare the data for presentation or synthesis, such as handling of missing summary statistics, or data conversions.                                                                                                             | N/A                                            |
|                               | 13c | Describe any methods used to tabulate or visually display results of individual studies and syntheses.                                                                                                                                                            | N/A                                            |
|                               | 13d | Describe any methods used to synthesize results and provide a rationale for the choice(s). If meta-analysis was performed, describe the model(s), method(s) to identify the presence and extent of statistical heterogeneity, and software package(s) used.       | 8                                              |
|                               | 13e | Describe any methods used to explore possible causes of heterogeneity among study results (e.g. subgroup analysis, meta-regression).                                                                                                                              | 8                                              |
|                               | 13f | Describe any sensitivity analyses conducted to assess robustness of the synthesized results.                                                                                                                                                                      | 8                                              |
| Reporting bias assessment     | 14  | Describe any methods used to assess risk of bias due to missing results in a synthesis (arising from reporting biases).                                                                                                                                           | 8                                              |
| Certainty assessment          | 15  | Describe any methods used to assess certainty (or confidence) in the body of evidence for an outcome.                                                                                                                                                             | N/A                                            |
| <b>RESULTS</b>                |     |                                                                                                                                                                                                                                                                   |                                                |
| Study selection               | 16a | Describe the results of the search and selection process, from the number of records identified in the search to the number of studies included in the review, ideally using a flow diagram.                                                                      | 8<br>Figure 1                                  |
|                               | 16b | Cite studies that might appear to meet the inclusion criteria, but which were excluded, and explain why they were excluded.                                                                                                                                       | eTable 4                                       |
| Study characteristics         | 17  | Cite each included study and present its characteristics.                                                                                                                                                                                                         | Table 1<br>eTable 8                            |

|                               |     |                                                                                                                                                                                                                                                                                      |                                      |
|-------------------------------|-----|--------------------------------------------------------------------------------------------------------------------------------------------------------------------------------------------------------------------------------------------------------------------------------------|--------------------------------------|
| Risk of bias in studies       | 18  | Present assessments of risk of bias for each included study.                                                                                                                                                                                                                         | Figure 2<br>Table 2<br>eTable 9      |
| Results of individual studies | 19  | For all outcomes, present, for each study: (a) summary statistics for each group (where appropriate) and (b) an effect estimate and its precision (e.g. confidence/credible interval), ideally using structured tables or plots.                                                     | Figure 2<br>Table 2                  |
| Results of syntheses          | 20a | For each synthesis, briefly summarise the characteristics and risk of bias among contributing studies                                                                                                                                                                                | 9-10<br>Table 2                      |
|                               | 20b | Present results of all statistical syntheses conducted. If meta-analysis was done, present for each the summary estimate and its precision (e.g. confidence/credible interval) and measures of statistical heterogeneity. If comparing groups, describe the direction of the effect. | Figure 2<br>Table 2                  |
|                               | 20c | Present results of all investigations of possible causes of heterogeneity among study results.                                                                                                                                                                                       | 9-10<br>Table 2                      |
|                               | 20d | Present results of all sensitivity analyses conducted to assess the robustness of the synthesized results.                                                                                                                                                                           | 9-10<br>Table 2<br>eTable 6          |
| Reporting biases              | 21  | Present assessments of risk of bias due to missing results (arising from reporting biases) for each synthesis assessed.                                                                                                                                                              | 9-10<br>Table 2<br>eFigure 4         |
| Certainty of evidence         | 22  | Present assessments of certainty (or confidence) in the body of evidence for each outcome assessed.                                                                                                                                                                                  | N/A                                  |
| <b>DISCUSSION</b>             |     |                                                                                                                                                                                                                                                                                      |                                      |
| Discussion                    | 23a | Provide a general interpretation of the results in the context of other evidence.                                                                                                                                                                                                    | 10-11                                |
|                               | 23b | Discuss any limitations of the evidence included in the review.                                                                                                                                                                                                                      | 11-12                                |
|                               | 23c | Discuss any limitations of the review processes used.                                                                                                                                                                                                                                | 12                                   |
|                               | 23d | Discuss implications of the results for practice, policy, and future research.                                                                                                                                                                                                       | 11-12                                |
| <b>OTHER INFORMATION</b>      |     |                                                                                                                                                                                                                                                                                      |                                      |
| Registration and protocol     | 24a | Provide registration information for the review, including register name and registration number, or state that the review was not registered.                                                                                                                                       | 8                                    |
|                               | 24b | Indicate where the review protocol can be accessed, or state that a protocol was not prepared.                                                                                                                                                                                       | Supplement on Open Science Framework |

|                                                |     |                                                                                                                                                                                                                                            |                                      |
|------------------------------------------------|-----|--------------------------------------------------------------------------------------------------------------------------------------------------------------------------------------------------------------------------------------------|--------------------------------------|
|                                                | 24c | Describe and explain any amendments to information provided at registration or in the protocol.                                                                                                                                            | Supplement on Open Science Framework |
| Support                                        | 25  | Describe sources of financial or non-financial support for the review, and the role of the funders or sponsors in the review.                                                                                                              | 1                                    |
| Competing interests                            | 26  | Declare any competing interests of review authors.                                                                                                                                                                                         | 1                                    |
| Availability of data, code and other materials | 27  | Report which of the following are publicly available and where they can be found: template data collection forms; data extracted from included studies; data used for all analyses; analytic code; any other materials used in the review. | N/A                                  |

392  
393  
394  
395

From: Page MJ, McKenzie JE, Bossuyt PM, Boutron I, Hoffmann TC, Mulrow CD, et al. The PRISMA 2020 statement: an updated guideline for reporting systematic reviews. *BMJ* 2021;372:n71. doi: 10.1136/bmj.n71  
For more information, visit: [www.prisma-statement.org](http://www.prisma-statement.org).

396  
397  
398  
399  
400  
401  
402

403 (6) COMPARISON CHARACTERISTICS

404

405 eTable 8. Comparison characteristics (39 studies, 85 comparisons).

406

| Study                          | Country | Cancer site <sup>a</sup>   | Sample size<br>(Trial   Routine care) <sup>b</sup> | Median age<br>(Trial   Routine care) <sup>c</sup> | Males (%)<br>(Trial   Routine care) <sup>c</sup> | Females (%)<br>(Trial   Routine care) <sup>c</sup> | Median OS follow-up<br>(years)<br>(Trial   Routine care) | Advanced/Metastatic | Routine care group<br>source                                                                 | Timeframe<br>information <sup>f</sup>                                                |
|--------------------------------|---------|----------------------------|----------------------------------------------------|---------------------------------------------------|--------------------------------------------------|----------------------------------------------------|----------------------------------------------------------|---------------------|----------------------------------------------------------------------------------------------|--------------------------------------------------------------------------------------|
| Abdel-Rahman 2019 <sup>1</sup> | Canada  | Prostate                   | 397   1718                                         | 65.3 <sup>d</sup>   68.4 <sup>d</sup>             | 100   100                                        | 0   0                                              | 13.3 <sup>e</sup>   10.8 <sup>e</sup>                    | No                  | Multi-centre   Academic and community centres                                                | January 2000 - April 2010   2004-2010 (diagnosis)                                    |
| Abu-Hejleh 2016 <sup>2</sup>   | US      | NSCLC                      | 38   759                                           | NR   NR                                           | 55   56                                          | 45   44                                            | 4.8 <sup>e</sup>   6.3 <sup>e</sup>                      | Yes                 | Multi-centre   Did not enroll in a trial                                                     | September 2003 - June 2005 (diagnosis)                                               |
| Arrieta 2016 <sup>3</sup>      | Mexico  | NSCLC                      | 295   747                                          | 60.9 <sup>d</sup>   60.3 <sup>d</sup>             | 47.5   54.8                                      | 52.5   45.2                                        | 2.8   2.8                                                | Yes                 | Single-centre   Instituto Nacional de Cancerología                                           | January 2007 - December 2014 (when patients presented themselves to the institution) |
| Aung 2021 <sup>4</sup>         | US      | Multiple myeloma           | 205   205                                          | 59.7 <sup>d</sup>   63.1 <sup>d</sup>             | 44.5   41.4                                      | 55.5   58.6                                        | 2.4   2.4                                                | No                  | Single-centre   Mount Sinai Health System                                                    | 2012-2018 (diagnosis)                                                                |
| Balyasny 2021a <sup>5</sup>    | US      | CNS (intermediate-risk)    | 1231   710                                         | NR   NR                                           | NR   NR                                          | NR   NR                                            | 8.5   8.4                                                | No                  | Multi-centre   Cooperative biology study (POG 9047 or COG ANBL00B1)                          | 1991-2011, excluding 2006   Prior to January 1, 2017 (diagnosis)                     |
| Balyasny 2021b <sup>5</sup>    | US      | CNS (high-risk)            | 922   807                                          | NR   NR                                           | NR   NR                                          | NR   NR                                            | 11   10.2                                                | No                  | Multi-centre   Cooperative biology study (POG 9047 or COG ANBL00B1)                          | 1991-2011, excluding 2006   Prior to January 1, 2017 (diagnosis)                     |
| Chow 2013 <sup>6</sup>         | US      | Solid tumours              | 1846   551842                                      | NR   NR                                           | 26.8   35.8                                      | 73.2   64.2                                        | NR   NR                                                  | No                  | Multi-centre (inferred)   Retrospective cohort study                                         | 2002-2008 (cancer registry and diagnosis)                                            |
| Ejlertsen 2008 <sup>7</sup>    | Europe  | Breast                     | 493   970                                          | NR   NR                                           | 0   0                                            | 100   100                                          | 12.1   12.1                                              | No                  | Multi-centre (inferred)   Not enrolled but trial-eligible and treated with the same protocol | January 1990 - May 1998 (registration)                                               |
| Elting 2006a <sup>8</sup>      | US      | Solid tumours (localized)  | 2788   9053                                        | NR   NR                                           | 53.6   50                                        | 46.3   49.7                                        | 7 <sup>e</sup>   7 <sup>e</sup>                          | No                  | Single-centre   MD Anderson Cancer Center                                                    | January 1990 - December 1997 (diagnosis)                                             |
| Elting 2006b <sup>8</sup>      | US      | Solid tumours (metastatic) | 1502   3297                                        | NR   NR                                           | NR   NR                                          | NR   NR                                            | 7 <sup>e</sup>   7 <sup>e</sup>                          | No                  | Single-centre   MD Anderson Cancer Center                                                    | January 1990 - December 1997 (diagnosis)                                             |
| Elumalai 2022 <sup>9</sup>     | UK      | Prostate                   | 2070   178                                         | NR   NR                                           | 100   100                                        | 0   0                                              | 4 <sup>e</sup>   4 <sup>e</sup>                          | Yes                 | Single-centre   Tertiary cancer centre                                                       | August 2007 - April 2012; January 2006 - November 2007; November 2009 -              |

| Study                             | Country   | Cancer site <sup>a</sup>                                 | Sample size<br>(Trial   Routine care) <sup>b</sup> | Median age<br>(Trial   Routine care) <sup>c</sup> | Males (%)<br>(Trial   Routine care) <sup>c</sup> | Females (%)<br>(Trial   Routine care) <sup>c</sup> | Median OS follow-up<br>(years)<br>(Trial   Routine care) | Advanced/Metastatic | Routine care group<br>source                                                              | Timeframe<br>information <sup>f</sup>                               |
|-----------------------------------|-----------|----------------------------------------------------------|----------------------------------------------------|---------------------------------------------------|--------------------------------------------------|----------------------------------------------------|----------------------------------------------------------|---------------------|-------------------------------------------------------------------------------------------|---------------------------------------------------------------------|
|                                   |           |                                                          |                                                    |                                                   |                                                  |                                                    |                                                          |                     |                                                                                           | November 2016; January 2008 - May 2011   February 2005 - April 2015 |
| Esteban 2015 <sup>10</sup>        | Europe    | Leukemia                                                 | 68   184                                           | 63   63                                           | 59   63                                          | 41   37                                            | 15 <sup>e</sup>   15 <sup>e</sup>                        | No                  | Single-centre   Not recruited                                                             | 2000-2014 (treatment)                                               |
| Field 2013 <sup>11</sup>          | Australia | CNS                                                      | 61   481                                           | 62   62                                           | NR   NR                                          | NR   NR                                            | 6.3 <sup>e</sup>   10.4 <sup>e</sup>                     | No                  | Multi-centre   Two co-located hospitals (one public, one private)                         | 1998-2010 (diagnosis)                                               |
| Filion 2014 <sup>12</sup>         | Canada    | Breast                                                   | 1137   5657                                        | NR   NR                                           | NR   NR                                          | NR   NR                                            | 6.1   6.1                                                | No                  | Single-centre   Largest tertiary breast cancer centre in Canada                           | January 1982 - April 2008 (diagnosis)                               |
| Goldman 2017 <sup>13</sup>        | US        | Melanoma                                                 | 115   203                                          | 60.2   64.1                                       | 64.3   69                                        | 35.7   31                                          | 7.5 <sup>e</sup>   5 <sup>e</sup>                        | Yes                 | Single-centre   Perlmutter Cancer Center                                                  | July 2006 - December 2013 (diagnosis)                               |
| Goyal 2012 <sup>14</sup>          | US        | Prostate                                                 | 142   105                                          | 67 <sup>d</sup>   68 <sup>d</sup>                 | 100   100                                        | 0   0                                              | 6.8 <sup>e</sup>   6.8 <sup>e</sup>                      | Yes                 | Single-centre   Not offered clinical trials, declined to participate, or trial-ineligible | January 1998 - December 2010 (treatment)                            |
| Han 2019 <sup>15</sup>            | Asia      | Gastric                                                  | 78   78                                            | NR   NR                                           | 73.1   66.7                                      | 26.9   33.3                                        | 1.1   1.1                                                | Yes                 | Single-centre   Seoul National University Bundang Hospital                                | January 2010 - December 2012 (treatment)                            |
| Hébert-Croteau 2005 <sup>16</sup> | Canada    | Breast                                                   | 207   569                                          | NR   NR                                           | NR   NR                                          | NR   NR                                            | 6.8   6.8                                                | No                  | Multi-centre   Five health regions                                                        | 1988-1994 (diagnosis)                                               |
| Kalata 2009a <sup>17</sup>        | Europe    | Colorectal (neoadjuvant CRT before resection)            | 379   106                                          | 61.6   62.3                                       | 71.5   67                                        | 28.5   33                                          | 3.4   3.4                                                | Yes                 | Multi-centre   Large urban and rural areas                                                | February 1995 - September 2002   1997-2003                          |
| Kalata 2009b <sup>17</sup>        | Europe    | Colorectal (resection with or without postoperative CRT) | 278   265                                          | 61.4   65.1                                       | 66.9   56.2                                      | 33.1   43.8                                        | 3.4   3.4                                                | Yes                 | Multi-centre   Large urban and rural areas                                                | February 1995 - September 2002   1997-2003                          |
| Keizman 2016 <sup>18</sup>        | Asia      | Kidney                                                   | 49   49                                            | 64   64                                           | 67   67                                          | 33   33                                            | 7.5 <sup>e</sup>   5.8 <sup>e</sup>                      | Yes                 | Multi-centre   Six centres across the US and Israel                                       | February 2004 - December 2013 (treatment)                           |
| Khoja 2016 <sup>19</sup>          | UK        | Ovarian                                                  | 30   30                                            | NR   NR                                           | 0   0                                            | 100   100                                          | 12.5 <sup>e</sup>   12.5 <sup>e</sup>                    | No                  | Single-centre   The Christie NHS Foundation Trust                                         | 2002-2008   NR                                                      |

| Study                        | Country   | Cancer site <sup>a</sup>                      | Sample size<br>(Trial   Routine care) <sup>b</sup> | Median age<br>(Trial   Routine care) <sup>c</sup> | Males (%)<br>(Trial   Routine care) <sup>c</sup> | Females (%)<br>(Trial   Routine care) <sup>c</sup> | Median OS follow-up<br>(years)<br>(Trial   Routine care) | Advanced/Metastatic | Routine care group<br>source                                        | Timeframe<br>information <sup>f</sup>                                           |
|------------------------------|-----------|-----------------------------------------------|----------------------------------------------------|---------------------------------------------------|--------------------------------------------------|----------------------------------------------------|----------------------------------------------------------|---------------------|---------------------------------------------------------------------|---------------------------------------------------------------------------------|
| Kostos 2021a <sup>20</sup>   | Australia | Pancreatic                                    | 431   139                                          | 62   68                                           | 57   49.3                                        | 43   50.6                                          | 0.8   2                                                  | Yes                 | Multi-centre   13 sites                                             | May 2009 - April 2012  <br>January 2014 - June 2019                             |
| Kostos 2021b <sup>20</sup>   | Australia | Breast                                        | 402   167                                          | 54   58                                           | 0   0.5                                          | 100   99.5                                         | 8.3   1.9                                                | Yes                 | Multi-centre   22 sites                                             | February 2008 - July 2010  <br>January 2014 - June 2019                         |
| Le Du 2016 <sup>21</sup>     | US        | Breast                                        | 285   367                                          | NR   NR                                           | NR   NR                                          | NR   NR                                            | 7.2   7.2                                                | Yes                 | Single-centre   MD<br>Anderson Cancer<br>Center                     | January 2000 -<br>December 2010<br>(treatment)                                  |
| Mayers 2001 <sup>22</sup>    | Canada    | Breast                                        | 160   519                                          | 45   45                                           | 0   0                                            | 100   100                                          | 9.6   9.6                                                | No                  | Single-centre   Princess<br>Margaret Hospital                       | 1980-1990 (treatment)                                                           |
| Melnick 2022 <sup>23</sup>   | US        | CNS                                           | 89   276                                           | 56.5 <sup>d</sup>   58.7 <sup>d</sup>             | NR   NR                                          | NR   NR                                            | 6 <sup>e</sup>   6 <sup>e</sup>                          | No                  | Single-centre  <br>University of Florida<br>Health                  | 2011-2020 (treatment)                                                           |
| Merkhofer 2021 <sup>24</sup> | US        | NSCLC                                         | 40   175                                           | 62 <sup>d</sup>   62 <sup>d</sup>                 | 35   49                                          | 65   51                                            | 4 <sup>e</sup>   10 <sup>e</sup>                         | Yes                 | Single-centre   Seattle<br>Cancer Care Alliance                     | January 2007 -<br>December 2015<br>(diagnosis)                                  |
| Mol 2013 <sup>25</sup>       | Europe    | Colorectal                                    | 394   224                                          | 61   61                                           | 65   59                                          | 35   41                                            | 8 <sup>e</sup>   5.5 <sup>e</sup>                        | Yes                 | Multi-centre   29<br>hospitals                                      | January 2003 -<br>December 2004                                                 |
| Ohno 2019 <sup>26</sup>      | Asia      | Breast                                        | 227   34                                           | 58   58                                           | 0   0                                            | 100   100                                          | 4 <sup>e</sup>   4 <sup>e</sup>                          | Yes                 | Multi-centre   Declined<br>to participate                           | August 2009 - July 2010                                                         |
| Phillips 2020a <sup>27</sup> | Canada    | Myelodysplastic<br>syndromes<br>(azacitidine) | 179   1183                                         | 69   75                                           | 73.7   NR                                        | 26.3   NR                                          | 3 <sup>e</sup>   7 <sup>e</sup>                          | No                  | Multi-centre   Cancer<br>Care Ontario's New<br>Drug Funding Program | February 2004 - August<br>2006   2008-2016                                      |
| Phillips 2020b <sup>27</sup> | Canada    | Leukemia<br>(azacitidine)                     | 55   376                                           | 70   72                                           | 67.3   NR                                        | 32.7   NR                                          | 3 <sup>e</sup>   5.5 <sup>e</sup>                        | No                  | Multi-centre   Cancer<br>Care Ontario's New<br>Drug Funding Program | November 2003 - July<br>2007   2008-2016                                        |
| Phillips 2020c <sup>27</sup> | Canada    | Non-Hodgkin<br>lymphoma<br>(bendamustine)     | 114   530                                          | 69   69                                           | NR   NR                                          | NR   NR                                            | 10 <sup>e</sup>   4 <sup>e</sup>                         | No                  | Multi-centre   Cancer<br>Care Ontario's New<br>Drug Funding Program | October 2003 - August<br>2010   2008-2016                                       |
| Phillips 2020d <sup>27</sup> | Canada    | Multiple<br>myeloma<br>(bortezomib)           | 584   4193                                         | NR   NR                                           | NR   NR                                          | NR   NR                                            | 6 <sup>e</sup>   8 <sup>e</sup>                          | No                  | Multi-centre   Cancer<br>Care Ontario's New<br>Drug Funding Program | December 2004 -<br>September 2006; August<br>2005 - January 2008  <br>2008-2016 |
| Phillips 2020e <sup>27</sup> | Canada    | Hodgkin<br>lymphoma<br>(brentuximab)          | 102   58                                           | 31   37                                           | 47   NR                                          | 53   NR                                            | 2 <sup>e</sup>   3.3 <sup>e</sup>                        | No                  | Multi-centre   Cancer<br>Care Ontario's New<br>Drug Funding Program | February 2009 - August<br>2009   2008-2016                                      |
| Phillips 2020f <sup>27</sup> | Canada    | T-cell<br>lymphoma<br>(brentuximab)           | 58   24                                            | 52   65                                           | 56.9   NR                                        | 43.1   NR                                          | 1.5 <sup>e</sup>   2.8 <sup>e</sup>                      | No                  | Multi-centre   Cancer<br>Care Ontario's New<br>Drug Funding Program | June 2009 - May 2010  <br>2008-2016                                             |

| Study                        | Country | Cancer site <sup>a</sup>                                 | Sample size<br>(Trial   Routine care) <sup>b</sup> | Median age<br>(Trial   Routine care) <sup>c</sup> | Males (%)<br>(Trial   Routine care) <sup>c</sup> | Females (%)<br>(Trial   Routine care) <sup>c</sup> | Median OS follow-up<br>(years)<br>(Trial   Routine care) | Advanced/Metastatic | Routine care group<br>source                                  | Timeframe<br>information <sup>f</sup>      |
|------------------------------|---------|----------------------------------------------------------|----------------------------------------------------|---------------------------------------------------|--------------------------------------------------|----------------------------------------------------|----------------------------------------------------------|---------------------|---------------------------------------------------------------|--------------------------------------------|
| Phillips 2020g <sup>27</sup> | Canada  | Leukemia (obinutuzumab)                                  | 333   249                                          | 74   76                                           | 61   NR                                          | 39   NR                                            | 3.8 <sup>e</sup>   1.8 <sup>e</sup>                      | No                  | Multi-centre   Cancer Care Ontario's New Drug Funding Program | February 2014 - September 2018   2008-2016 |
| Phillips 2020h <sup>27</sup> | Canada  | Leukemia (rituximab)                                     | 408   1523                                         | 61   64                                           | 74   NR                                          | 26   NR                                            | 5.5 <sup>e</sup>   7 <sup>e</sup>                        | No                  | Multi-centre   Cancer Care Ontario's New Drug Funding Program | July 2003 - July 2007   2008-2016          |
| Phillips 2020i <sup>27</sup> | Canada  | Pancreatic (gemcitabine/na b-paclitaxel)                 | 431   602                                          | 62   69                                           | 56.8   NR                                        | 43.2   NR                                          | 3 <sup>e</sup>   2 <sup>e</sup>                          | No                  | Multi-centre   Cancer Care Ontario's New Drug Funding Program | May 2009 - April 2012   2008-2016          |
| Phillips 2020j <sup>27</sup> | Canada  | Pancreatic (folforinox)                                  | 171   1056                                         | 61   70                                           | 62   NR                                          | 38   NR                                            | 4 <sup>e</sup>   5.5 <sup>e</sup>                        | No                  | Multi-centre   Cancer Care Ontario's New Drug Funding Program | December 2005 - October 2009   2008-2016   |
| Phillips 2020k <sup>27</sup> | Canada  | Gastric (trastuzumab)                                    | 298   409                                          | 59   64                                           | 77   NR                                          | 23   NR                                            | 3 <sup>e</sup>   5.5 <sup>e</sup>                        | No                  | Multi-centre   Cancer Care Ontario's New Drug Funding Program | September 2005 - December 2008   2008-2016 |
| Phillips 2020l <sup>27</sup> | Canada  | Breast (eribulin)                                        | 508   733                                          | 55   57                                           | 0   NR                                           | 100   NR                                           | 2.3 <sup>e</sup>   3.8 <sup>e</sup>                      | No                  | Multi-centre   Cancer Care Ontario's New Drug Funding Program | November 2006 - November 2008   2008-2016  |
| Phillips 2020m <sup>27</sup> | Canada  | Breast (pertuzumab)                                      | 402   827                                          | 54   56                                           | 0   NR                                           | 100   NR                                           | 6 <sup>e</sup>   3.5 <sup>e</sup>                        | No                  | Multi-centre   Cancer Care Ontario's New Drug Funding Program | February 2008 - July 2010   2008-2016      |
| Phillips 2020n <sup>27</sup> | Canada  | Breast (second-line trastuzumab emtansine)               | 495   320                                          | 53   56                                           | 0.2   NR                                         | 99.8   NR                                          | 5.5 <sup>e</sup>   3 <sup>e</sup>                        | No                  | Multi-centre   Cancer Care Ontario's New Drug Funding Program | February 2009 - October 2011   2008-2016   |
| Phillips 2020o <sup>27</sup> | Canada  | Breast (third- or subsequent-line trastuzumab emtansine) | 404   52                                           | 53   58                                           | 0.7   NR                                         | 99.3   NR                                          | 3.3 <sup>e</sup>   2.8 <sup>e</sup>                      | No                  | Multi-centre   Cancer Care Ontario's New Drug Funding Program | September 2011 - November 2012   2008-2016 |
| Phillips 2020p <sup>27</sup> | Canada  | Cervical (bevacizumab)                                   | 227   54                                           | 48   46                                           | 0   0                                            | 100   100                                          | 3 <sup>e</sup>   1.3 <sup>e</sup>                        | No                  | Multi-centre   Cancer Care Ontario's New Drug Funding Program | April 2009 - January 2012   2008-2016      |
| Phillips 2020q <sup>27</sup> | Canada  | Ovarian (bevacizumab)                                    | 764   53                                           | 57   62                                           | 0   0                                            | 100   100                                          | 5 <sup>e</sup>   1.5 <sup>e</sup>                        | No                  | Multi-centre   Cancer Care Ontario's New Drug Funding Program | December 2006 - February 2009   2008-2016  |
| Phillips 2020r <sup>27</sup> | Canada  | Malignant pleural mesothelioma (pemetrexed)              | 226   204                                          | 61   71                                           | 81.4   NR                                        | 18.6   NR                                          | 2.5 <sup>e</sup>   3 <sup>e</sup>                        | No                  | Multi-centre   Cancer Care Ontario's New Drug Funding Program | April 1999 - March 2001   2008-2016        |
| Phillips 2020s <sup>27</sup> | Canada  | NSCLC (second-line pemetrexed)                           | 265   459                                          | 59   65                                           | NR   NR                                          | NR   NR                                            | 2 <sup>e</sup>   8 <sup>e</sup>                          | No                  | Multi-centre   Cancer Care Ontario's New Drug Funding Program | March 2001 - February 2002   2008-2016     |

| Study                           | Country | Cancer site <sup>a</sup>                  | Sample size<br>(Trial   Routine care) <sup>b</sup> | Median age<br>(Trial   Routine care) <sup>c</sup> | Males (%)<br>(Trial   Routine care) <sup>c</sup> | Females (%)<br>(Trial   Routine care) <sup>c</sup> | Median OS follow-up<br>(years)<br>(Trial   Routine care) | Advanced/Metastatic | Routine care group<br>source                                                                            | Timeframe<br>information <sup>f</sup>                                                                                  |
|---------------------------------|---------|-------------------------------------------|----------------------------------------------------|---------------------------------------------------|--------------------------------------------------|----------------------------------------------------|----------------------------------------------------------|---------------------|---------------------------------------------------------------------------------------------------------|------------------------------------------------------------------------------------------------------------------------|
| Phillips 2020t <sup>27</sup>    | Canada  | NSCLC (first-line/maintenance pemetrexed) | 359   1424                                         | 61   66                                           | 56   NR                                          | 44   NR                                            | 3 <sup>e</sup>   4.5 <sup>e</sup>                        | No                  | Multi-centre   Cancer Care Ontario's New Drug Funding Program                                           | February 2009 - July 2010   2008-2016                                                                                  |
| Phillips 2020u <sup>27</sup>    | Canada  | Melanoma (ipilimumab)                     | 137   103                                          | 57   63                                           | 59.1   NR                                        | 40.9   NR                                          | 4.5 <sup>e</sup>   4.5 <sup>e</sup>                      | No                  | Multi-centre   Cancer Care Ontario's New Drug Funding Program                                           | September 2004 - August 2008   2008-2016                                                                               |
| Phillips 2020v <sup>27</sup>    | Canada  | Melanoma (pembrolizumab)                  | 279   274                                          | 63   69                                           | 57.7   NR                                        | 42.3   NR                                          | 1.5 <sup>e</sup>   1 <sup>e</sup>                        | No                  | Multi-centre   Cancer Care Ontario's New Drug Funding Program                                           | September 2013 - March 2014   2008-2016                                                                                |
| Phillips 2020w <sup>27</sup>    | Canada  | Prostate (cabazitaxel)                    | 378   188                                          | 68   70                                           | 100   100                                        | 0   0                                              | 2.5 <sup>e</sup>   2.8 <sup>e</sup>                      | No                  | Multi-centre   Cancer Care Ontario's New Drug Funding Program                                           | January 2007 - October 2008   2008-2016                                                                                |
| Phillips 2020x <sup>27</sup>    | Canada  | Prostate (docetaxel)                      | 397   495                                          | 64   67                                           | 100   100                                        | 0   0                                              | 6 <sup>e</sup>   2 <sup>e</sup>                          | No                  | Multi-centre   Cancer Care Ontario's New Drug Funding Program                                           | July 2006 - December 2012   2008-2016                                                                                  |
| Phillips 2020y <sup>27</sup>    | Canada  | Kidney (temsirolimus)                     | 209   64                                           | 58   63                                           | 66.5   NR                                        | 33.5   NR                                          | 2 <sup>e</sup>   5 <sup>e</sup>                          | No                  | Multi-centre   Cancer Care Ontario's New Drug Funding Program                                           | July 2003 - April 2005   2008-2016                                                                                     |
| Schapira 2020 <sup>28</sup>     | US      | Leukemia                                  | 214   214                                          | 6.5 <sup>d</sup>   6.9 <sup>d</sup>               | 43.9   43                                        | 56.1   57                                          | 9.4   9.4                                                | No                  | Single-centre   Children's Hospital of Philadelphia                                                     | 2000-2010 (diagnosis)                                                                                                  |
| Schwentner 2013 <sup>29</sup>   | Europe  | Breast                                    | 1255   4888                                        | 55.8 <sup>d</sup>   62.1 <sup>d</sup>             | 0   0                                            | 100   100                                          | 15 <sup>e</sup>   15 <sup>e</sup>                        | No                  | Multi-centre   Department of Gynaecology and Obstetrics at the University of Ulm and 16 partner clinics | 1992-2008 (diagnosis or treatment)                                                                                     |
| Shahar 2012 <sup>30</sup>       | Asia    | CNS                                       | 60   36                                            | 55.5 <sup>d</sup>   54.6 <sup>d</sup>             | NR   NR                                          | NR   NR                                            | 2.5 <sup>e</sup>   3.3 <sup>e</sup>                      | No                  | Single-centre   Tel Aviv Medical Center                                                                 | March 1995 - May 2008 (treatment)                                                                                      |
| Strahlendorf 2018 <sup>31</sup> | Canada  | Leukemia                                  | 1408   1161                                        | NR   NR                                           | 57.5   55.2                                      | 42.5   44.8                                        | 13 <sup>e</sup>   13 <sup>e</sup>                        | No                  | Multi-centre   17 tertiary pediatric oncology centres in Canada                                         | January 2001 - December 2012 (diagnosis)                                                                               |
| Tanai 2009 <sup>32</sup>        | Asia    | NSCLC                                     | 196   76                                           | NR   NR                                           | 60.7   60.5                                      | 39.3   39.5                                        | 1.1   1.1                                                | Yes                 | Single-centre   Declined participation in trials                                                        | October 2000 - June 2002; June 2003 - October 2005   October 2000 - October 2005 (invitation to participate in trials) |
| Tanai 2011 <sup>33</sup>        | Asia    | Gastric                                   | 190   96                                           | NR   NR                                           | 77   67                                          | 23   33                                            | 0.9   0.8                                                | Yes                 | Single-centre   Declined participation in trials                                                        | November 2000 - January 2006 (treatment)                                                                               |



| Study                           | Country | Cancer site <sup>a</sup>  | Sample size<br>(Trial   Routine care) <sup>b</sup> | Median age<br>(Trial   Routine care) <sup>c</sup> | Males (%)<br>(Trial   Routine care) <sup>c</sup> | Females (%)<br>(Trial   Routine care) <sup>c</sup> | Median OS follow-up<br>(years)<br>(Trial   Routine care) | Advanced/Metastatic | Routine care group<br>source                                          | Timeframe<br>information <sup>f</sup>                                                                        |
|---------------------------------|---------|---------------------------|----------------------------------------------------|---------------------------------------------------|--------------------------------------------------|----------------------------------------------------|----------------------------------------------------------|---------------------|-----------------------------------------------------------------------|--------------------------------------------------------------------------------------------------------------|
| Templeton<br>2013 <sup>34</sup> | Canada  | Prostate                  | 43   314                                           | 68   71                                           | 100   100                                        | 0   0                                              | 6 <sup>e</sup>   6 <sup>e</sup>                          | Yes                 | Single-centre   Princess<br>Margaret Cancer Centre                    | February 2001 -<br>December 2011<br>(treatment)                                                              |
| Toxopeus<br>2018 <sup>35</sup>  | Europe  | Esophageal                | 208   173                                          | 60 <sup>d</sup>   62 <sup>d</sup>                 | 78   79                                          | 22   21                                            | 5 <sup>e</sup>   5 <sup>e</sup>                          | No                  | Single-centre   Post-<br>CROSS cohort                                 | February 2001 - January<br>2004; March 2004 -<br>December 2008   July<br>2008 - December 2013<br>(treatment) |
| Truong<br>2018 <sup>36</sup>    | Canada  | Leukemia                  | 94   303                                           | NR   NR                                           | 52.1   47.9                                      | 47.9   52.1                                        | 11 <sup>e</sup>   13 <sup>e</sup>                        | No                  | Multi-centre   17 tertiary<br>pediatric oncology<br>centres in Canada | January 2001 -<br>December 2012<br>(diagnosis)                                                               |
| Unger<br>2014a <sup>37</sup>    | US      | CNS (SWOG-<br>0001)       | 89   2264                                          | 56   NR                                           | 62   NR                                          | 38   NR                                            | 5 <sup>e</sup>   5 <sup>e</sup>                          | No                  | Multi-centre   SEER                                                   | 2001-2005                                                                                                    |
| Unger<br>2014b <sup>37</sup>    | US      | Breast (SWOG-<br>9313)    | 1423   9941                                        | NR   NR                                           | 0   0                                            | 100   100                                          | 5 <sup>e</sup>   5 <sup>e</sup>                          | No                  | Multi-centre   SEER                                                   | 1994-1997                                                                                                    |
| Unger<br>2014c <sup>37</sup>    | US      | Breast (SWOG-<br>0012)    | 391   2855                                         | NR   NR                                           | 0   0                                            | 100   100                                          | 5 <sup>e</sup>   5 <sup>e</sup>                          | No                  | Multi-centre   SEER                                                   | 2001-2005                                                                                                    |
| Unger<br>2014d <sup>37</sup>    | US      | Pancreatic<br>(SWOG-0205) | 82   1943                                          | NR   NR                                           | NR   NR                                          | NR   NR                                            | 5 <sup>e</sup>   5 <sup>e</sup>                          | Yes                 | Multi-centre   SEER                                                   | 2004-2006                                                                                                    |
| Unger<br>2014e <sup>37</sup>    | US      | Bladder<br>(SWOG-8795)    | 191   5059                                         | NR   NR                                           | NR   NR                                          | NR   NR                                            | 5 <sup>e</sup>   5 <sup>e</sup>                          | No                  | Multi-centre   SEER                                                   | 1988-1992                                                                                                    |
| Unger<br>2014f <sup>37</sup>    | US      | Kidney (SWOG-<br>8949)    | 95   1569                                          | NR   NR                                           | NR   NR                                          | NR   NR                                            | 5 <sup>e</sup>   5 <sup>e</sup>                          | Yes                 | Multi-centre   SEER                                                   | 1991-1998                                                                                                    |
| Unger<br>2014g <sup>37</sup>    | US      | Leukemia<br>(SWOG-9031)   | 85   1672                                          | NR   NR                                           | NR   NR                                          | NR   NR                                            | 5 <sup>e</sup>   5 <sup>e</sup>                          | No                  | Multi-centre   SEER                                                   | 1991-1994                                                                                                    |
| Unger<br>2014h <sup>37</sup>    | US      | Leukemia<br>(SWOG-9333)   | 129   2320                                         | NR   NR                                           | NR   NR                                          | NR   NR                                            | 5 <sup>e</sup>   5 <sup>e</sup>                          | No                  | Multi-centre   SEER                                                   | 1995-1998                                                                                                    |
| Unger<br>2014i <sup>37</sup>    | US      | NSCLC<br>(SWOG-8738)      | 94   4084                                          | NR   NR                                           | NR   NR                                          | NR   NR                                            | 5 <sup>e</sup>   5 <sup>e</sup>                          | Yes                 | Multi-centre   SEER                                                   | 1988-1990                                                                                                    |
| Unger<br>2014j <sup>37</sup>    | US      | NSCLC<br>(SWOG-9308)      | 178   4755                                         | NR   NR                                           | NR   NR                                          | NR   NR                                            | 5 <sup>e</sup>   5 <sup>e</sup>                          | Yes                 | Multi-centre   SEER                                                   | 1993-1995                                                                                                    |
| Unger<br>2014k <sup>37</sup>    | US      | NSCLC<br>(SWOG-9509)      | 205   4817                                         | NR   NR                                           | NR   NR                                          | NR   NR                                            | 5 <sup>e</sup>   5 <sup>e</sup>                          | Yes                 | Multi-centre   SEER                                                   | 1996-1997                                                                                                    |
| Unger<br>2014l <sup>37</sup>    | US      | NSCLC<br>(SWOG-0003)      | 165   7727                                         | NR   NR                                           | NR   NR                                          | NR   NR                                            | 5 <sup>e</sup>   5 <sup>e</sup>                          | Yes                 | Multi-centre   SEER                                                   | 2000-2002                                                                                                    |
| Unger<br>2014m <sup>37</sup>    | US      | SCLC (SWOG-<br>0124)      | 266   2790                                         | NR   NR                                           | NR   NR                                          | NR   NR                                            | 5 <sup>e</sup>   5 <sup>e</sup>                          | Yes                 | Multi-centre   SEER                                                   | 2002-2007                                                                                                    |
| Unger<br>2014n <sup>37</sup>    | US      | Melanoma<br>(SWOG-8642)   | 96   738                                           | NR   NR                                           | NR   NR                                          | NR   NR                                            | 5 <sup>e</sup>   5 <sup>e</sup>                          | No                  | Multi-centre   SEER                                                   | 1987-1990                                                                                                    |
| Unger<br>2014o <sup>37</sup>    | US      | Melanoma<br>(SWOG-9035)   | 299   1347                                         | NR   NR                                           | NR   NR                                          | NR   NR                                            | 5 <sup>e</sup>   5 <sup>e</sup>                          | No                  | Multi-centre   SEER                                                   | 1992-1996                                                                                                    |

| Study                          | Country | Cancer site <sup>a</sup>       | Sample size<br>(Trial   Routine care) <sup>b</sup> | Median age<br>(Trial   Routine care) <sup>c</sup> | Males (%)<br>(Trial   Routine care) <sup>c</sup> | Females (%)<br>(Trial   Routine care) <sup>c</sup> | Median OS follow-up<br>(years)<br>(Trial   Routine care) | Advanced/Metastatic | Routine care group<br>source                                               | Timeframe<br>information <sup>f</sup>                                   |
|--------------------------------|---------|--------------------------------|----------------------------------------------------|---------------------------------------------------|--------------------------------------------------|----------------------------------------------------|----------------------------------------------------------|---------------------|----------------------------------------------------------------------------|-------------------------------------------------------------------------|
| Unger 2014p <sup>37</sup>      | US      | Multiple myeloma (SWOG-8624)   | 139   3515                                         | NR   NR                                           | NR   NR                                          | NR   NR                                            | 5 <sup>e</sup>   5 <sup>e</sup>                          | No                  | Multi-centre   SEER                                                        | 1987-1990                                                               |
| Verstovsek 2012a <sup>38</sup> | US      | Leukemia (intermediate-2-risk) | 34   140                                           | NR   NR                                           | NR   NR                                          | NR   NR                                            | 2.7   4.6                                                | No                  | Multi-centre   MDACC, University of Pavia, and Hospital Niguarda cà Granda | June 2007 - December 2007   1978-2010                                   |
| Verstovsek 2012b <sup>38</sup> | US      | Leukemia (high-risk)           | 63   160                                           | NR   NR                                           | NR   NR                                          | NR   NR                                            | 2.7   4.6                                                | No                  | Multi-centre   MDACC, University of Pavia, and Hospital Niguarda cà Granda | June 2007 - December 2007   1978-2010                                   |
| Xu 2020a <sup>39</sup>         | Asia    | Head and neck (NCT00677118)    | 96   167                                           | 44 <sup>d</sup>   45 <sup>d</sup>                 | 74   74.9                                        | 26   25.1                                          | 3.2   5 <sup>e</sup>                                     | Yes                 | Multi-centre   NCT04108338                                                 | June 2006 - March 2010   April 2009 - December 2016 (treatment)         |
| Xu 2020b <sup>39</sup>         | Asia    | Head and neck (NCT01245959)    | 209   367                                          | 44 <sup>d</sup>   44 <sup>d</sup>                 | 71.8   73.6                                      | 28.2   26.4                                        | 3.8   5 <sup>e</sup>                                     | Yes                 | Multi-centre   NCT04108338                                                 | March 2011 - August 2013   April 2009 - December 2016 (treatment)       |
| Xu 2020c <sup>39</sup>         | Asia    | Head and neck (NCT01872962)    | 215   351                                          | 45 <sup>d</sup>   45 <sup>d</sup>                 | 70.2   69.2                                      | 29.8   30.8                                        | 3.6   3 <sup>e</sup>                                     | Yes                 | Multi-centre   NCT04108338                                                 | December 2013 - September 2016   April 2009 - December 2016 (treatment) |

CNS: central nervous system; CRT: chemoradiotherapy; NR: not reported; NSCLC: non-small cell lung cancer; OS: overall survival; SCLC: small cell lung cancer.

<sup>a</sup>Additional information was provided to distinguish comparisons in multi-comparison studies.

<sup>b</sup>Sample sizes used to calculate the overall survival hazard ratios.

<sup>c</sup>Age or sex was only reported if the same sample size was used to calculate the overall survival hazard ratios, otherwise we wrote "NR".

<sup>d</sup>Mean.

<sup>e</sup>If the median was not reported, follow-up time was taken from other reported follow-up times or derived from the endpoint of survival curves.

<sup>f</sup>If timeframes were different, they were presented as "Trial | Routine care".

## References

- Abdel-Rahman, O. Comparison of outcomes of radiotherapy-treated localized prostate cancer patients within a clinical trial setting versus real-life setting. *Future Oncol* **15**, 1269–1277 (2019).
- Abu-Hejleh, T. *et al.* The Effect of Receiving Treatment Within a Clinical Trial Setting on Survival and Quality of Care Perception in Advanced Stage Non-Small Cell Lung Cancer: *American Journal of Clinical Oncology* **39**, 126–131 (2016).
- Arrieta, O. *et al.* Survival of Patients with Advanced Non-Small Cell Lung Cancer Enrolled in Clinical Trials. *Oncology* **91**, 185–193 (2016).
- Aung, T. N. *et al.* Do Patients With Multiple Myeloma Enrolled in Clinical Trials Live Longer? *American Journal of Clinical Oncology* **44**, 603–612 (2021).

- 416 5. Balyasny, S. *et al.* Association Between Participation in Clinical Trials and Overall Survival Among Children With Intermediate- or High-risk Neuroblastoma. *JAMA Network Open* **4**,  
417 e2116248 (2021).
- 418 6. Chow, C. J. *et al.* Does enrollment in cancer trials improve survival? *Journal of the American College of Surgeons* **216**, 774–781 (2013).
- 419 7. Ejlertsen, B. *et al.* DBCG trial 89B comparing adjuvant CMF and ovarian ablation: Similar outcome for eligible but non-enrolled and randomized breast cancer patients. *Acta*  
420 *Oncologica* **47**, 709–717 (2008).
- 421 8. Elting, L. S. *et al.* Generalizability of cancer clinical trial results: prognostic differences between participants and nonparticipants. *Cancer* **106**, 2452–8 (2006).
- 422 9. Elumalai T. *et al.* Translation of Prognostic and Pharmacodynamic Biomarkers from Trial to Non-trial Patients with Metastatic Castration-resistant Prostate Cancer Treated with  
423 Docetaxel. *Clinical Oncology* **34**, e291–e297 (2022).
- 424 10. Esteban, D. *et al.* Patients with relapsed/refractory chronic lymphocytic leukaemia may benefit from inclusion in clinical trials irrespective of the therapy received: a case-control  
425 retrospective analysis. *Blood Cancer Journal* **5**, e356–e356 (2015).
- 426 11. Field, K. M. *et al.* Clinical trial participation and outcome for patients with glioblastoma: Multivariate analysis from a comprehensive dataset. *Journal of Clinical Neuroscience* **20**,  
427 783–789 (2013).
- 428 12. Provencher L, F. M. Survival Rate of Breast Cancer Patients who Participated in Clinicals Trials Versus those who did not. *Journal of Clinical Trials* **04**, (2014).
- 429 13. Goldman, C. *et al.* Outcomes in Melanoma Patients Treated with BRAF/MEK-Directed Therapy or Immune Checkpoint Inhibition Stratified by Clinical Trial versus Standard of Care.  
430 *Oncology* **93**, 164–176 (2017).
- 431 14. Goyal, J. *et al.* The effect of clinical trial participation versus non-participation on overall survival in men receiving first-line docetaxel-containing chemotherapy for metastatic  
432 castration-resistant prostate cancer: CLINICAL TRIAL PARTICIPATION AND SURVIVAL IN MEN WITH CRPC. *BJU International* **110**, E575–E582 (2012).
- 433 15. Han, J. J. *et al.* Clinical characteristics and outcomes of patients enrolled in clinical trials compared with those of patients outside clinical trials in advanced gastric cancer. *Asia-*  
434 *Pacific journal of clinical oncology* **15**, 158–165 (2019).
- 435 16. Hébert-Croteau, N., Brisson, J., Lemaire, J. & Latreille, J. The benefit of participating to clinical research. *Breast Cancer Research and Treatment* **91**, 279–281 (2005).
- 436 17. Kalata, P. *et al.* Differences Between Clinical Trial Participants and Patients in a Population-Based Registry: the German Rectal Cancer Study vs. the Rostock Cancer Registry.  
437 *Diseases of the Colon & Rectum* **52**, 425–437 (2009).
- 438 18. Keizman, D. *et al.* Is there a ‘trial effect’ on outcome of patients with metastatic renal cell carcinoma treated with sunitinib? *Cancer research and treatment* **48**, 281–287 (2016).
- 439 19. Khoja, L. *et al.* Does clinical trial participation improve outcomes in patients with ovarian cancer? *ESMO Open* **1**, e000057 (2016).
- 440 20. Kostos L *et al.* Cancer clinical trial vs real-world outcomes for standard of care first-line treatment in the advanced disease setting. *Int J Cancer* **149**, 409–419 (2021).
- 441 21. Le Du, F. *et al.* Impact of clinical trial on survival outcomes. *Breast Cancer Res Treat* **159**, 273–81 (2016).
- 442 22. Mayers, C., Panzarella, T. & Tannock, I. F. Analysis of the prognostic effects of inclusion in a clinical trial and of myelosuppression on survival after adjuvant chemotherapy for breast  
443 carcinoma. *Cancer* **91**, 2246–2257 (2001).
- 444 23. Melnick KF *et al.* The trial effect in patients with glioblastoma: effect of clinical trial enrollment on overall survival. *J Neurooncol* **159**, 479–484 (2022).

- 445  
446 24. Merkhofer, C. M., Eaton, K. D., Martins, R. G., Ramsey, S. D. & Goulart, B. H. L. Impact of Clinical Trial Participation on Survival of Patients with Metastatic Non-Small Cell Lung Cancer. *Clinical Lung Cancer* **22**, 523–530 (2021).
- 447  
448 25. Mol, L., Koopman, M., van Gils, C. W. M., Ottevanger, P. B. & Punt, C. J. A. Comparison of treatment outcome in metastatic colorectal cancer patients included in a clinical trial versus daily practice in The Netherlands. *Acta Oncologica* **52**, 950–955 (2013).
- 449  
450 26. Ohno, S. *et al.* Participants in a randomized controlled trial had longer overall survival than non-participants: a prospective cohort study. *Breast Cancer Res Treat* (2019) doi:10.1007/s10549-019-05276-y.
- 451  
452 27. Phillips, C. M. *et al.* Assessing the efficacy-effectiveness gap for cancer therapies: A comparison of overall survival and toxicity between clinical trial and population-based, real-world data for contemporary parenteral cancer therapeutics. *Cancer* **126**, 1717–1726 (2020).
- 453 28. Schapira, M. M. *et al.* Outcomes among pediatric patients with cancer who are treated on trial versus off trial: A matched cohort study. *Cancer* **126**, 3471–3482 (2020).
- 454  
455 29. Schwentner, L. *et al.* Participation in adjuvant clinical breast cancer trials: does study participation improve survival compared to guideline adherent adjuvant treatment? A retrospective multi-centre cohort study of 9,433 patients. *Eur J Cancer* **49**, 553–63 (2013).
- 456 30. Shahar, T. *et al.* The impact of enrollment in clinical trials on survival of patients with glioblastoma. *Journal of Clinical Neuroscience* **19**, 1530-1534 (2012).
- 457  
458 31. Strahlendorf, C. *et al.* Enrolling children with acute lymphoblastic leukaemia on a clinical trial improves event-free survival: a population-based study. *Br J Cancer* **118**, 744–749 (2018).
- 459  
460 32. Tanai, C. *et al.* Characteristics and outcomes of patients with advanced non-small-cell lung cancer who declined to participate in randomised clinical chemotherapy trials. *British Journal of Cancer* **100**, 1037–1042 (2009).
- 461  
462 33. Tanai, C. *et al.* Characteristics and outcomes of patients with advanced gastric cancer who declined to participate in a randomized clinical chemotherapy trial. *Journal of Oncology Practice* **7**, 148–153 (2011).
- 463  
464 34. Templeton, A. J. *et al.* Translating clinical trials to clinical practice: outcomes of men with metastatic castration resistant prostate cancer treated with docetaxel and prednisone in and out of clinical trials. *Annals of Oncology* **24**, 2972–2977 (2013).
- 465  
466 35. Toxopeus, E. *et al.* Outcome of Patients Treated Within and Outside a Randomized Clinical Trial on Neoadjuvant Chemoradiotherapy Plus Surgery for Esophageal Cancer: Extrapolation of a Randomized Clinical Trial (CROSS). *Annals of Surgical Oncology* **25**, 2441–2448 (2018).
- 467 36. Truong, T. H. *et al.* Enrollment on clinical trials does not improve survival for children with acute myeloid leukemia: A population-based study. *Cancer* **124**, 4098–4106 (2018).
- 468 37. Unger, J. M. *et al.* Comparison of Survival Outcomes Among Cancer Patients Treated In and Out of Clinical Trials. *JNCI: Journal of the National Cancer Institute* **106**, (2014).
- 469  
470 38. Verstovsek, S. *et al.* Long-term outcomes of 107 patients with myelofibrosis receiving JAK1/JAK2 inhibitor ruxolitinib: survival advantage in comparison to matched historical controls. *Blood* **120**, 1202–1209 (2012).
- 471  
472 39. Xu, C. *et al.* Association between outcome disparities and pragmatic features related to clinical trial and real-world settings in nasopharyngeal carcinoma: A population-based retrospective cohort study, 2006-2016. *Radiotherapy and oncology* **151**, 306–313 (2020).
- 473  
474

475 **eTable 9. Quality scoring for adjustment in individual studies. Adjusted = 1 point; not adjusted = 0 points;**  
 476 **not reported or unclear = -1 point. The quality scores were categorized as low ( $\leq 6$  points), medium (7**  
 477 **points), and high ( $\geq 8$  points).**  
 478

| Adjustment<br>Study | Age | Sex | Race/ethnicity | Comorbidities | Stage | Histology | Performance status | Line of treatment | Eligibility | Routine care group includes trial refusers | Treatment | Timeframe | Single trial comparison | Routine care group from registries | Similar trial and routine care group source | Sample size | Adjustment score |
|---------------------|-----|-----|----------------|---------------|-------|-----------|--------------------|-------------------|-------------|--------------------------------------------|-----------|-----------|-------------------------|------------------------------------|---------------------------------------------|-------------|------------------|
| Abdel-Rahman 2019   | 1   | 1   | 1              | 1             | 1     | 0         | 1                  | 1                 | 1           | -1                                         | 1         | 1         | 1                       | 1                                  | 0                                           | 1           | 12               |
| Abu-Hejleh 2016     | 1   | 1   | 1              | 1             | 1     | 1         | 1                  | 0                 | -1          | -1                                         | 1         | 1         | 0                       | 1                                  | 1                                           | 0           | 9                |
| Arrieta 2016        | 1   | 1   | 1              | 1             | 1     | 1         | 1                  | 0                 | -1          | -1                                         | -1        | 1         | 0                       | 0                                  | 1                                           | 1           | 7                |
| Aung 2021           | 1   | 1   | 1              | 1             | 1     | 0         | 0                  | 1                 | 0           | -1                                         | 0         | 1         | 0                       | 0                                  | 1                                           | 1           | 8                |
| Balyasny 2021a      | 1   | 1   | 1              | 0             | 1     | 1         | 0                  | 0                 | -1          | -1                                         | 0         | 1         | 0                       | 1                                  | 1                                           | 1           | 7                |
| Balyasny 2021b      | 1   | 1   | 1              | 0             | 1     | 1         | 0                  | 0                 | -1          | -1                                         | 0         | 1         | 0                       | 1                                  | 1                                           | 1           | 7                |
| Chow 2013           | 1   | 1   | 1              | 0             | 1     | 1         | 0                  | 0                 | 0           | -1                                         | 0         | 1         | 0                       | 1                                  | 1                                           | 1           | 8                |
| Ejlertsen 2008      | 1   | 1   | 1              | 0             | 0     | 1         | 0                  | 0                 | 1           | 0                                          | 1         | 1         | 1                       | 1                                  | 1                                           | 1           | 11               |
| Elting 2006a        | 1   | 1   | 1              | 1             | 1     | 1         | 1                  | 1                 | -1          | -1                                         | -1        | 1         | 0                       | 1                                  | 0                                           | 1           | 8                |
| Elting 2006b        | 1   | 1   | 1              | 1             | 1     | 1         | 1                  | 1                 | -1          | -1                                         | -1        | 1         | 0                       | 1                                  | 0                                           | 1           | 8                |
| Elumalai 2022       | 0   | 1   | 0              | 0             | 0     | 0         | 1                  | 0                 | -1          | -1                                         | 1         | 1         | 0                       | 0                                  | 0                                           | 1           | 3                |
| Esteban 2015        | 1   | 1   | 1              | 1             | 1     | 0         | 1                  | 0                 | 1           | 0                                          | 1         | 1         | 0                       | 0                                  | 1                                           | 0           | 10               |
| Field 2013          | 1   | 1   | 0              | 0             | 1     | 0         | 1                  | 0                 | -1          | -1                                         | 0         | 1         | 0                       | 1                                  | 1                                           | 0           | 5                |
| Filion 2014         | 1   | 1   | 0              | 1             | 1     | 1         | 0                  | 0                 | -1          | 0                                          | 1         | 1         | 0                       | 0                                  | 1                                           | 1           | 8                |
| Goldman 2017        | 1   | 1   | 0              | 0             | 0     | 0         | 0                  | 1                 | -1          | -1                                         | 1         | 1         | 0                       | 1                                  | 1                                           | 0           | 5                |
| Goyal 2012          | 1   | 1   | 0              | 0             | 1     | 0         | 1                  | 0                 | 0           | 0                                          | 0         | 0         | 0                       | 0                                  | 1                                           | 0           | 5                |
| Han 2019            | 1   | 1   | 1              | 1             | 0     | 1         | 0                  | 1                 | -1          | -1                                         | 1         | 1         | 0                       | 0                                  | 1                                           | 0           | 7                |
| Hébert-Croteau 2005 | 1   | 1   | 0              | 1             | 1     | 0         | 0                  | 0                 | 1           | -1                                         | 0         | 1         | 0                       | 1                                  | 1                                           | 1           | 8                |
| Kalata 2009a        | 1   | 1   | 1              | 0             | 1     | 0         | 0                  | 0                 | -1          | -1                                         | 1         | 1         | 1                       | 1                                  | 0                                           | 1           | 7                |
| Kalata 2009b        | 1   | 1   | 1              | 0             | 1     | 0         | 0                  | 0                 | -1          | -1                                         | 1         | 1         | 1                       | 1                                  | 0                                           | 1           | 7                |

| <b>Adjustment</b><br><b>Study</b> | Age | Sex | Race/ethnicity | Comorbidities | Stage | Histology | Performance status | Line of treatment | Eligibility | Routine care group includes trial refusers | Treatment | Timeframe | Single trial comparison | Routine care group from registries | Similar trial and routine care group source | Sample size | <b>Adjustment score</b> |
|-----------------------------------|-----|-----|----------------|---------------|-------|-----------|--------------------|-------------------|-------------|--------------------------------------------|-----------|-----------|-------------------------|------------------------------------|---------------------------------------------|-------------|-------------------------|
| <b>Keizman 2016</b>               | 1   | 1   | 0              | 0             | 1     | 1         | 1                  | 1                 | 1           | -1                                         | 1         | 1         | 0                       | 0                                  | 1                                           | 0           | <b>9</b>                |
| <b>Khoja 2016</b>                 | 1   | 1   | 0              | 0             | 1     | 1         | 1                  | 1                 | 0           | 1                                          | 1         | 0         | 0                       | 0                                  | 1                                           | 0           | <b>9</b>                |
| <b>Kostos 2021a</b>               | 0   | 0   | 0              | 0             | 0     | 0         | 1                  | 1                 | 1           | 0                                          | 1         | 0         | 1                       | 1                                  | 0                                           | 1           | <b>7</b>                |
| <b>Kostos 2021b</b>               | 0   | 1   | 0              | 0             | 0     | 0         | 1                  | 1                 | 1           | 0                                          | 1         | 0         | 1                       | 1                                  | 0                                           | 1           | <b>8</b>                |
| <b>Le Du 2016</b>                 | 1   | 1   | 1              | 1             | 0     | 0         | 0                  | 1                 | 1           | -1                                         | -1        | 1         | 0                       | 0                                  | 1                                           | 1           | <b>7</b>                |
| <b>Mayers 2001</b>                | 0   | 1   | 0              | 0             | 1     | 0         | 0                  | 0                 | -1          | -1                                         | 1         | 1         | 0                       | 0                                  | 1                                           | 0           | <b>3</b>                |
| <b>Melnick 2022</b>               | 1   | 0   | 0              | 0             | 0     | 0         | 1                  | 0                 | -1          | 0                                          | 1         | 1         | 0                       | 0                                  | 1                                           | 0           | <b>4</b>                |
| <b>Merkhofer 2021</b>             | 1   | 1   | 1              | 0             | 0     | 1         | 1                  | 1                 | 1           | -1                                         | -1        | 1         | 0                       | 1                                  | 1                                           | 0           | <b>8</b>                |
| <b>Mol 2013</b>                   | 1   | 1   | 0              | 0             | 1     | 0         | 1                  | 1                 | 1           | 0                                          | 1         | 1         | 1                       | 1                                  | 0                                           | 1           | <b>11</b>               |
| <b>Ohno 2019</b>                  | 1   | 1   | 1              | 0             | 0     | 0         | 1                  | 1                 | 1           | 0                                          | -1        | 1         | 1                       | 1                                  | 1                                           | 1           | <b>10</b>               |
| <b>Phillips 2020a</b>             | 0   | 0   | 0              | 0             | 0     | 0         | 0                  | 1                 | 0           | -1                                         | 1         | 0         | 1                       | 1                                  | 0                                           | 0           | <b>3</b>                |
| <b>Phillips 2020b</b>             | 0   | 0   | 0              | 0             | 0     | 0         | 0                  | 1                 | 0           | -1                                         | 1         | 0         | 1                       | 1                                  | 0                                           | 0           | <b>3</b>                |
| <b>Phillips 2020c</b>             | 0   | 0   | 0              | 0             | 0     | 0         | 0                  | 1                 | 0           | -1                                         | 1         | 0         | 1                       | 1                                  | 0                                           | 0           | <b>3</b>                |
| <b>Phillips 2020d</b>             | 0   | 0   | 0              | 0             | 0     | 0         | 0                  | 1                 | 0           | -1                                         | 1         | 0         | 0                       | 1                                  | 0                                           | 1           | <b>3</b>                |
| <b>Phillips 2020e</b>             | 0   | 0   | 0              | 0             | 0     | 0         | 0                  | 1                 | 0           | -1                                         | 1         | 0         | 1                       | 1                                  | 0                                           | 0           | <b>3</b>                |
| <b>Phillips 2020f</b>             | 0   | 0   | 0              | 0             | 0     | 0         | 0                  | 1                 | 0           | -1                                         | 1         | 0         | 1                       | 1                                  | 0                                           | 0           | <b>3</b>                |
| <b>Phillips 2020g</b>             | 0   | 0   | 0              | 0             | 0     | 0         | 0                  | 1                 | 0           | -1                                         | 1         | 0         | 1                       | 1                                  | 0                                           | 1           | <b>4</b>                |
| <b>Phillips 2020h</b>             | 0   | 0   | 0              | 0             | 0     | 0         | 0                  | 1                 | 0           | -1                                         | 1         | 0         | 1                       | 1                                  | 0                                           | 1           | <b>4</b>                |
| <b>Phillips 2020i</b>             | 0   | 0   | 0              | 0             | 0     | 0         | 0                  | 1                 | 0           | -1                                         | 1         | 1         | 1                       | 1                                  | 0                                           | 1           | <b>5</b>                |
| <b>Phillips 2020j</b>             | 0   | 0   | 0              | 0             | 0     | 0         | 0                  | 1                 | 0           | -1                                         | 1         | 0         | 1                       | 1                                  | 0                                           | 0           | <b>3</b>                |
| <b>Phillips 2020k</b>             | 0   | 0   | 0              | 0             | 0     | 0         | 0                  | 1                 | 0           | -1                                         | 1         | 0         | 1                       | 1                                  | 0                                           | 1           | <b>4</b>                |
| <b>Phillips 2020l</b>             | 0   | 0   | 0              | 0             | 0     | 0         | 0                  | 1                 | 0           | -1                                         | 1         | 0         | 1                       | 1                                  | 0                                           | 1           | <b>4</b>                |
| <b>Phillips 2020m</b>             | 0   | 0   | 0              | 0             | 0     | 0         | 0                  | 1                 | 0           | -1                                         | 1         | 0         | 1                       | 1                                  | 0                                           | 1           | <b>4</b>                |
| <b>Phillips 2020n</b>             | 0   | 0   | 0              | 0             | 0     | 0         | 0                  | 1                 | 0           | -1                                         | 1         | 1         | 1                       | 1                                  | 0                                           | 1           | <b>5</b>                |

| <b>Adjustment</b><br><b>Study</b> | Age | Sex | Race/ethnicity | Comorbidities | Stage | Histology | Performance status | Line of treatment | Eligibility | Routine care group includes trial refusers | Treatment | Timeframe | Single trial comparison | Routine care group from registries | Similar trial and routine care group source | Sample size | <b>Adjustment score</b> |
|-----------------------------------|-----|-----|----------------|---------------|-------|-----------|--------------------|-------------------|-------------|--------------------------------------------|-----------|-----------|-------------------------|------------------------------------|---------------------------------------------|-------------|-------------------------|
| Phillips 2020o                    | 0   | 0   | 0              | 0             | 0     | 0         | 0                  | 1                 | 0           | -1                                         | 1         | 1         | 1                       | 1                                  | 0                                           | 1           | 5                       |
| Phillips 2020p                    | 0   | 0   | 0              | 0             | 0     | 0         | 0                  | 1                 | 0           | -1                                         | 1         | 1         | 1                       | 1                                  | 0                                           | 1           | 5                       |
| Phillips 2020q                    | 0   | 0   | 0              | 0             | 0     | 0         | 0                  | 1                 | 0           | -1                                         | 1         | 0         | 1                       | 1                                  | 0                                           | 1           | 4                       |
| Phillips 2020r                    | 0   | 0   | 0              | 0             | 0     | 0         | 0                  | 1                 | 0           | -1                                         | 1         | 0         | 1                       | 1                                  | 0                                           | 1           | 4                       |
| Phillips 2020s                    | 0   | 0   | 0              | 0             | 0     | 0         | 0                  | 1                 | 0           | -1                                         | 1         | 0         | 1                       | 1                                  | 0                                           | 1           | 4                       |
| Phillips 2020t                    | 0   | 0   | 0              | 0             | 0     | 0         | 0                  | 1                 | 0           | -1                                         | 1         | 0         | 1                       | 1                                  | 0                                           | 1           | 4                       |
| Phillips 2020u                    | 0   | 0   | 0              | 0             | 0     | 0         | 0                  | 1                 | 0           | -1                                         | 1         | 0         | 1                       | 1                                  | 0                                           | 0           | 3                       |
| Phillips 2020v                    | 0   | 0   | 0              | 0             | 0     | 0         | 0                  | 1                 | 0           | -1                                         | 1         | 1         | 1                       | 1                                  | 0                                           | 1           | 5                       |
| Phillips 2020w                    | 0   | 0   | 0              | 0             | 0     | 0         | 0                  | 1                 | 0           | -1                                         | 1         | 0         | 1                       | 1                                  | 0                                           | 1           | 4                       |
| Phillips 2020x                    | 0   | 0   | 0              | 0             | 0     | 0         | 0                  | 1                 | 0           | -1                                         | 1         | 1         | 1                       | 1                                  | 0                                           | 1           | 5                       |
| Phillips 2020y                    | 0   | 0   | 0              | 0             | 0     | 0         | 0                  | 1                 | 0           | -1                                         | 1         | 0         | 1                       | 1                                  | 0                                           | 1           | 4                       |
| Schapira 2020                     | 1   | 1   | 1              | 1             | 0     | 0         | 0                  | 1                 | 1           | -1                                         | -1        | 1         | 0                       | 1                                  | 1                                           | 1           | 8                       |
| Schwentner 2013                   | 1   | 1   | 1              | 1             | 1     | 0         | 0                  | 0                 | -1          | -1                                         | -1        | 1         | 0                       | 0                                  | 1                                           | 1           | 5                       |
| Shahar 2012                       | 1   | 0   | 0              | 0             | 0     | 0         | 1                  | 0                 | 1           | -1                                         | -1        | 1         | 0                       | 0                                  | 1                                           | 0           | 3                       |
| Strahlendorf 2018                 | 1   | 1   | 1              | 0             | 0     | 0         | 0                  | 0                 | 0           | 0                                          | 0         | 1         | 0                       | 1                                  | 1                                           | 1           | 7                       |
| Tanai 2009                        | 1   | 1   | 1              | 0             | 1     | 0         | 1                  | 1                 | 1           | 0                                          | -1        | 1         | 0                       | 0                                  | 1                                           | 0           | 8                       |
| Tanai 2011                        | 1   | 1   | 1              | 0             | 1     | 1         | 1                  | 1                 | 1           | 0                                          | 1         | 1         | 1                       | 0                                  | 1                                           | 0           | 12                      |
| Templeton 2013                    | 1   | 1   | 0              | 1             | 1     | 0         | 1                  | 1                 | 0           | 0                                          | 1         | 1         | 0                       | 0                                  | 1                                           | 0           | 9                       |
| Toxopeus 2018                     | 1   | 1   | 0              | 0             | 1     | 1         | 0                  | 0                 | 0           | 1                                          | 1         | 0         | 0                       | 0                                  | 0                                           | 1           | 7                       |
| Truong 2018                       | 1   | 1   | 1              | 0             | 1     | 0         | 0                  | 0                 | 0           | 0                                          | 0         | 1         | 0                       | 1                                  | 1                                           | 0           | 7                       |
| Unger 2014a                       | 1   | 1   | 1              | 0             | 1     | 1         | 0                  | 0                 | 0           | -1                                         | 0         | 1         | 1                       | 1                                  | 0                                           | 0           | 7                       |
| Unger 2014b                       | 1   | 1   | 1              | 0             | 1     | 1         | 0                  | 0                 | 0           | -1                                         | 0         | 1         | 1                       | 1                                  | 0                                           | 1           | 8                       |
| Unger 2014c                       | 1   | 1   | 1              | 0             | 1     | 1         | 0                  | 0                 | 0           | -1                                         | 0         | 1         | 1                       | 1                                  | 0                                           | 1           | 8                       |

| <b>Adjustment</b><br><b>Study</b> | Age | Sex | Race/ethnicity | Comorbidities | Stage | Histology | Performance status | Line of treatment | Eligibility | Routine care group includes trial refusers | Treatment | Timeframe | Single trial comparison | Routine care group from registries | Similar trial and routine care group source | Sample size | <b>Adjustment score</b> |
|-----------------------------------|-----|-----|----------------|---------------|-------|-----------|--------------------|-------------------|-------------|--------------------------------------------|-----------|-----------|-------------------------|------------------------------------|---------------------------------------------|-------------|-------------------------|
| Unger 2014d                       | 1   | 1   | 1              | 0             | 1     | 1         | 0                  | 0                 | 0           | -1                                         | 0         | 1         | 1                       | 1                                  | 0                                           | 0           | 7                       |
| Unger 2014e                       | 1   | 1   | 1              | 0             | 1     | 1         | 0                  | 0                 | 0           | -1                                         | 0         | 1         | 1                       | 1                                  | 0                                           | 0           | 7                       |
| Unger 2014f                       | 1   | 1   | 1              | 0             | 1     | 1         | 0                  | 0                 | 0           | -1                                         | 0         | 1         | 1                       | 1                                  | 0                                           | 0           | 7                       |
| Unger 2014g                       | 1   | 1   | 1              | 0             | 1     | 1         | 0                  | 0                 | 0           | -1                                         | 0         | 1         | 1                       | 1                                  | 0                                           | 0           | 7                       |
| Unger 2014h                       | 1   | 1   | 1              | 0             | 1     | 1         | 0                  | 0                 | 0           | -1                                         | 0         | 1         | 1                       | 1                                  | 0                                           | 0           | 7                       |
| Unger 2014i                       | 1   | 1   | 1              | 0             | 1     | 1         | 0                  | 0                 | 0           | -1                                         | 0         | 1         | 1                       | 1                                  | 0                                           | 0           | 7                       |
| Unger 2014j                       | 1   | 1   | 1              | 0             | 1     | 1         | 0                  | 0                 | 0           | -1                                         | 0         | 1         | 1                       | 1                                  | 0                                           | 0           | 7                       |
| Unger 2014k                       | 1   | 1   | 1              | 0             | 1     | 1         | 0                  | 0                 | 0           | -1                                         | 0         | 1         | 1                       | 1                                  | 0                                           | 1           | 8                       |
| Unger 2014l                       | 1   | 1   | 1              | 0             | 1     | 1         | 0                  | 0                 | 0           | -1                                         | 0         | 1         | 1                       | 1                                  | 0                                           | 0           | 7                       |
| Unger 2014m                       | 1   | 1   | 1              | 0             | 1     | 1         | 0                  | 0                 | 0           | -1                                         | 0         | 1         | 1                       | 1                                  | 0                                           | 1           | 8                       |
| Unger 2014n                       | 1   | 1   | 1              | 0             | 1     | 1         | 0                  | 0                 | 0           | -1                                         | 0         | 1         | 1                       | 1                                  | 0                                           | 0           | 7                       |
| Unger 2014o                       | 1   | 1   | 1              | 0             | 1     | 1         | 0                  | 0                 | 0           | -1                                         | 0         | 1         | 1                       | 1                                  | 0                                           | 1           | 8                       |
| Unger 2014p                       | 1   | 1   | 1              | 0             | 1     | 1         | 0                  | 0                 | 0           | -1                                         | 0         | 1         | 1                       | 1                                  | 0                                           | 0           | 7                       |
| Verstovsek 2012a                  | 0   | 1   | 0              | 0             | 1     | 0         | 1                  | 0                 | 1           | -1                                         | 0         | 0         | 1                       | 1                                  | 0                                           | 0           | 5                       |
| Verstovsek 2012b                  | 0   | 1   | 0              | 0             | 1     | 0         | 1                  | 0                 | 1           | -1                                         | 0         | 0         | 1                       | 1                                  | 0                                           | 0           | 5                       |
| Xu 2020a                          | 1   | 1   | 1              | 0             | 1     | 1         | 0                  | 0                 | 0           | -1                                         | 0         | 1         | 1                       | 1                                  | 0                                           | 0           | 7                       |
| Xu 2020b                          | 0   | 1   | 1              | 0             | 1     | 1         | 0                  | 0                 | 0           | -1                                         | 0         | 1         | 1                       | 1                                  | 0                                           | 1           | 7                       |
| Xu 2020c                          | 1   | 1   | 1              | 0             | 1     | 1         | 0                  | 0                 | 0           | -1                                         | 0         | 1         | 1                       | 1                                  | 0                                           | 1           | 8                       |



## (7) SUBGROUP ANALYSES BY COMPARISON CHARACTERISTICS

**eTable 10. Results of subgroup analyses of comparisons by various characteristics.**

| Characteristics                                                             | No. of comparisons | Pooled HR-random model |         | Heterogeneity |           | Significance         |
|-----------------------------------------------------------------------------|--------------------|------------------------|---------|---------------|-----------|----------------------|
|                                                                             |                    | HR (95% CI)            | P-value | Q             | Q P-value | P-value <sup>a</sup> |
| <b>All comparisons</b>                                                      | 85                 | 0.76 (0.69-0.82)       | <0.001  | 688.56        | <0.001    | N/A                  |
| <b>Patient Characteristics</b>                                              |                    |                        |         |               |           |                      |
| Focuses on advanced/metastatic cancer patients                              | 28                 | 0.82 (0.70-0.95)       | 0.0076  | 84.92         | <0.001    | 0.25                 |
| Does not focus on advanced/metastatic cancer patients                       | 57                 | 0.73 (0.66-0.81)       | <0.001  | 603.61        | <0.001    |                      |
| <b>Treatment Characteristics</b>                                            |                    |                        |         |               |           |                      |
| Comparisons with crossover                                                  | 11                 | 0.73 (0.59-0.92)       | 0.0065  | 90.03         | <0.001    | 0.30                 |
| Comparisons without crossover                                               | 27                 | 0.70 (0.60-0.80)       | <0.001  | 163.58        | <0.001    |                      |
| Presence of crossover is unclear                                            | 47                 | 0.81 (0.72-0.91)       | <0.001  | 398.02        | <0.001    |                      |
| Intervention type includes drugs                                            | 79                 | 0.75 (0.69-0.81)       | <0.001  | 380.66        | <0.001    | 0.43                 |
| Intervention type is unknown                                                | 6                  | 0.86 (0.61-1.20)       | 0.37    | 185.55        | <0.001    |                      |
| <b>Setting Characteristics</b>                                              |                    |                        |         |               |           |                      |
| Comparison from the United States                                           | 31                 | 0.87 (0.75-1.02)       | 0.079   | 238.85        | <0.001    | 0.03                 |
| Comparison from other countries                                             | 54                 | 0.72 (0.65-0.79)       | <0.001  | 336.40        | <0.001    |                      |
| Routine care group is from a single institution                             | 21                 | 0.79 (0.67-0.93)       | 0.0052  | 263.64        | <0.001    | 0.55                 |
| Routine care group is from multiple institutions                            | 64                 | 0.74 (0.68-0.82)       | <0.001  | 342.99        | <0.001    |                      |
| <b>Other Characteristics</b>                                                |                    |                        |         |               |           |                      |
| Earlier publications (2000-2009)                                            | 8                  | 0.81 (0.62-1.06)       | 0.12    | 202.88        | <0.001    | 0.60                 |
| Later publications (2010-2022)                                              | 77                 | 0.75 (0.69-0.81)       | <0.001  | 362.40        | <0.001    |                      |
| Includes data on trial phase                                                | 72                 | 0.74 (0.68-0.81)       | <0.001  | 358.82        | <0.001    | 0.47                 |
| Missing data on trial phase                                                 | 13                 | 0.81 (0.66-0.99)       | 0.042   | 244.25        | <0.001    |                      |
| Trials are sponsored by industry                                            | 37                 | 0.67 (0.59-0.75)       | <0.001  | 234.39        | <0.001    | 0.005                |
| Trials are not sponsored by industry                                        | 28                 | 0.90 (0.78-1.03)       | 0.13    | 60.93         | <0.001    |                      |
| Trial sponsorship is unknown                                                | 20                 | 0.81 (0.70-0.95)       | 0.01    | 262.27        | <0.001    |                      |
| Studies with overall survival follow-up time of $\geq 4$ years <sup>b</sup> | 51                 | 0.84 (0.76-0.94)       | 0.0013  | 325.52        | <0.001    | 0.0039               |
| Studies with overall survival follow-up time of $< 4$ years <sup>b</sup>    | 33                 | 0.66 (0.58-0.75)       | <0.001  | 195.08        | <0.001    |                      |

---

<sup>a</sup>The significance p-value shows whether there is a significant difference between items in each subgroup. For example, in the first category, the p-value is 0.25. This shows that there is no statistically significant difference in survival estimates for comparisons of studies focusing on advanced/metastatic patients vs. studies that did not focus on advanced/metastatic patients.

<sup>b</sup>If the median was not reported, follow-up time was taken from other reported follow-up times or derived from the endpoint of survival curves. This subgroup analysis combines follow-up times from medians and curves.

483 (8) POST-HOC AND EXPLORATORY ANALYSES  
 484  
 485

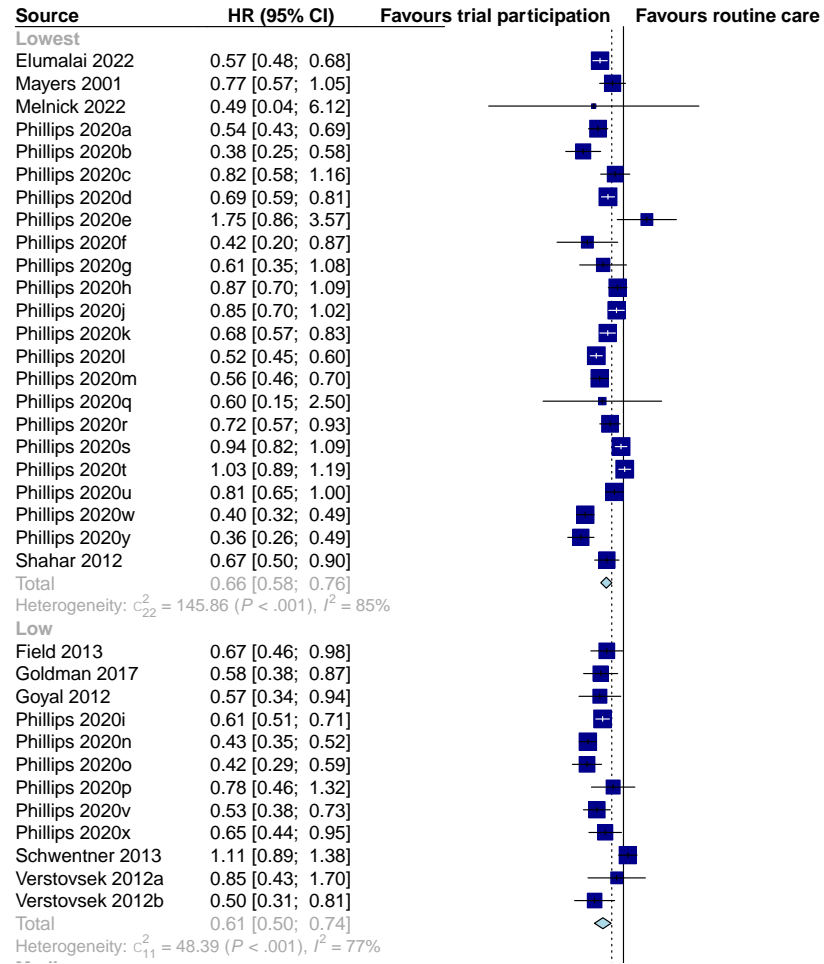

|                                                                 |                    |
|-----------------------------------------------------------------|--------------------|
| <b>Medium</b>                                                   |                    |
| Arrieta 2016                                                    | 0.47 [0.28; 0.78]  |
| Balyasny 2021a                                                  | 0.68 [0.45; 1.03]  |
| Balyasny 2021b                                                  | 1.01 [0.88; 1.15]  |
| Han 2019                                                        | 0.53 [0.37; 0.77]  |
| Kalata 2009a                                                    | 0.72 [0.44; 1.19]  |
| Kalata 2009b                                                    | 0.45 [0.30; 0.66]  |
| Kostos 2021a                                                    | 0.97 [0.40; 2.38]  |
| Le Du 2016                                                      | 0.89 [0.72; 1.10]  |
| Strahlendorf 2018                                               | 0.69 [0.44; 1.08]  |
| Toxopeus 2018                                                   | 0.98 [0.72; 1.33]  |
| Truong 2018                                                     | 0.96 [0.59; 1.57]  |
| Unger 2014a                                                     | 1.11 [0.91; 1.35]  |
| Unger 2014d                                                     | 0.52 [0.01; 19.90] |
| Unger 2014e                                                     | 0.94 [0.59; 1.49]  |
| Unger 2014f                                                     | 0.72 [0.04; 11.57] |
| Unger 2014g                                                     | 0.68 [0.03; 13.32] |
| Unger 2014h                                                     | 0.78 [0.07; 8.27]  |
| Unger 2014i                                                     | 0.73 [0.05; 10.78] |
| Unger 2014j                                                     | 0.75 [0.04; 15.50] |
| Unger 2014l                                                     | 0.74 [0.03; 21.37] |
| Unger 2014n                                                     | 0.98 [0.23; 4.16]  |
| Unger 2014p                                                     | 0.98 [0.41; 2.32]  |
| Xu 2020a                                                        | 1.09 [0.51; 2.32]  |
| Xu 2020b                                                        | 1.80 [1.20; 2.70]  |
| Total                                                           | 0.85 [0.73; 0.98]  |
| Heterogeneity: $c_{23}^2 = 49.25$ ( $P = .001$ ), $I^2 = 53\%$  |                    |
| <b>High</b>                                                     |                    |
| Aung 2021                                                       | 1.36 [0.83; 2.23]  |
| Chow 2013                                                       | 0.74 [0.67; 0.81]  |
| Elting 2006a                                                    | 1.37 [1.29; 1.45]  |
| Elting 2006b                                                    | 0.80 [0.76; 0.85]  |
| Filion 2014                                                     | 0.95 [0.80; 1.13]  |
| Hébert-Croteau 2005                                             | 0.45 [0.27; 0.74]  |
| Kostos 2021b                                                    | 0.93 [0.59; 1.46]  |
| Merkhofer 2021                                                  | 1.05 [0.72; 1.53]  |
| Schapira 2020                                                   | 0.69 [0.42; 1.13]  |
| Tanai 2009                                                      | 0.96 [0.73; 1.28]  |
| Unger 2014b                                                     | 0.90 [0.41; 1.98]  |
| Unger 2014c                                                     | 0.95 [0.67; 1.35]  |
| Unger 2014k                                                     | 0.61 [0.02; 23.34] |
| Unger 2014m                                                     | 0.81 [0.05; 13.60] |
| Unger 2014o                                                     | 0.97 [0.37; 2.57]  |
| Xu 2020c                                                        | 1.24 [0.69; 2.22]  |
| Total                                                           | 0.92 [0.76; 1.12]  |
| Heterogeneity: $c_{15}^2 = 224.46$ ( $P < .001$ ), $I^2 = 93\%$ |                    |
| <b>Highest</b>                                                  |                    |
| Abdel-Rahman 2019                                               | 0.79 [0.45; 1.39]  |
| Abu-Hejleh 2016                                                 | 0.99 [0.62; 1.59]  |
| Ejlertsen 2008                                                  | 1.08 [0.90; 1.30]  |
| Esteban 2015                                                    | 0.38 [0.17; 0.88]  |
| Keizman 2016                                                    | 0.97 [0.77; 1.22]  |
| Khoja 2016                                                      | 0.87 [0.46; 1.64]  |
| Mol 2013                                                        | 1.10 [0.97; 1.24]  |
| Ohno 2019                                                       | 0.49 [0.04; 5.78]  |
| Tanai 2011                                                      | 0.83 [0.62; 1.10]  |
| Templeton 2013                                                  | 0.82 [0.51; 1.31]  |
| Total                                                           | 0.98 [0.87; 1.09]  |
| Heterogeneity: $c_9^2 = 11.77$ ( $P = .23$ ), $I^2 = 24\%$      |                    |
| Total                                                           | 0.76 [0.69; 0.82]  |
| Prediction interval                                             | [0.40; 1.43]       |

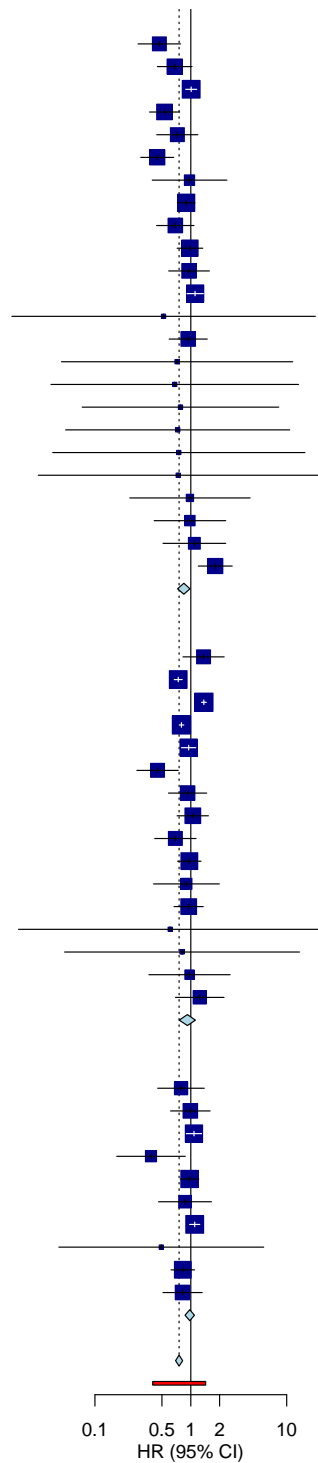

Heterogeneity:  $c_{84}^2 = 688.56$  ( $P < .001$ ),  $I^2 = 88\%$   
 Test for subgroup differences:  $c_4^2 = 28.76$  ( $P < .001$ )

**eFigure 2. Forest plot of pooled overall survival hazard ratios in five adjustment score groups: lowest-quality ( $\leq 4$  points), low-quality (5-6 points), medium-quality (7 points), high-quality (8 points), and highest-quality ( $\geq 9$  points).**

487 When comparisons were divided into high-quality ( $\geq 8$  points) and not high-quality ( $< 8$  points), the high-quality  
488 subgroup ( $n=26$ ) had an HR of 0.91 (95% CI, 0.80-1.05) and the not high-quality subgroup ( $n=59$ ) had an HR of  
489 0.70 (95% CI, 0.63-0.77). There was a significant difference between the groups ( $p=0.0016$ ).

490  
491 When comparisons were divided into low-quality ( $\leq 6$  points) and not low-quality ( $> 6$  points), the low-quality subgroup  
492 ( $n=35$ ) had an HR of 0.64 (95% CI, 0.58-0.72) and the not low-quality subgroup ( $n=50$ ) had an HR of 0.89 (95% CI,  
493 0.80-0.98). There was a significant difference between the groups ( $p<0.0001$ ).

494  
495 We also performed a linear regression comparing effect size and quality adjustment score, which showed a  
496 significant correlation ( $p = 0.0005$ ). Therefore, quality adjustment score(predictor) influences the studies' effect size.  
497 For every increase in quality adjustment score, the effect size is expected to increase by 0.06.

498  
499 Some studies were not expressly aimed at measuring the trial effect. For example, some studies were focused on  
500 comparing characteristics of trial participants and routine care patients to understand their differences (i.e. the  
501 efficacy-effectiveness gap). These studies did not try to control for different factors to make the groups more similar.  
502 They were interested in understanding the crude and unadjusted differences. When we filter our sample for  
503 comparisons that had a stated objective of estimating the trial effect ( $n=32$ ), the HR was 0.85 (95% CI, 0.76-0.95).  
504 The mean quality score for this subset was 7.9. For the other comparisons that did not expressly set out to measure  
505 the trial effect or had unclear objectives ( $n=53$ ), the HR was 0.70 (95% CI, 0.63-0.78). The mean quality score for  
506 this subset was 5.4. There was a significant difference between HRs for these two groups ( $p=0.015$ ).

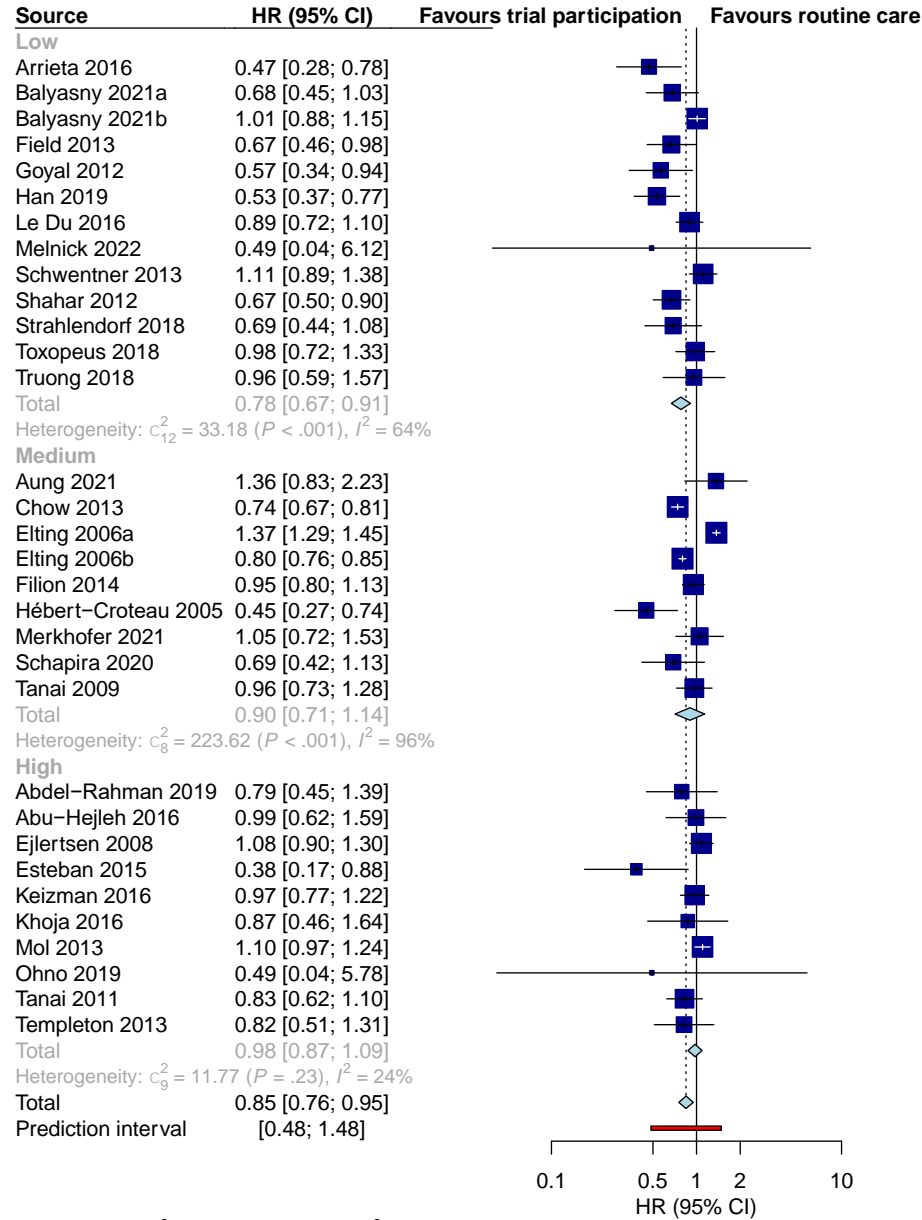

Heterogeneity:  $c_{31}^2 = 276.65$  ( $P < .001$ ),  $I^2 = 89\%$   
 Test for subgroup differences:  $c_2^2 = 5.31$  ( $P = .07$ )

**eFigure 3. Forest plot of pooled overall survival hazard ratios focusing on comparisons that stated their aim as estimating the trial effect (n=32) and grouped by low-quality ( $\leq 7$  points), medium-quality (8 points), and high-quality ( $\geq 9$  points) adjustment scores.**

508 (9) FUNNEL PLOT

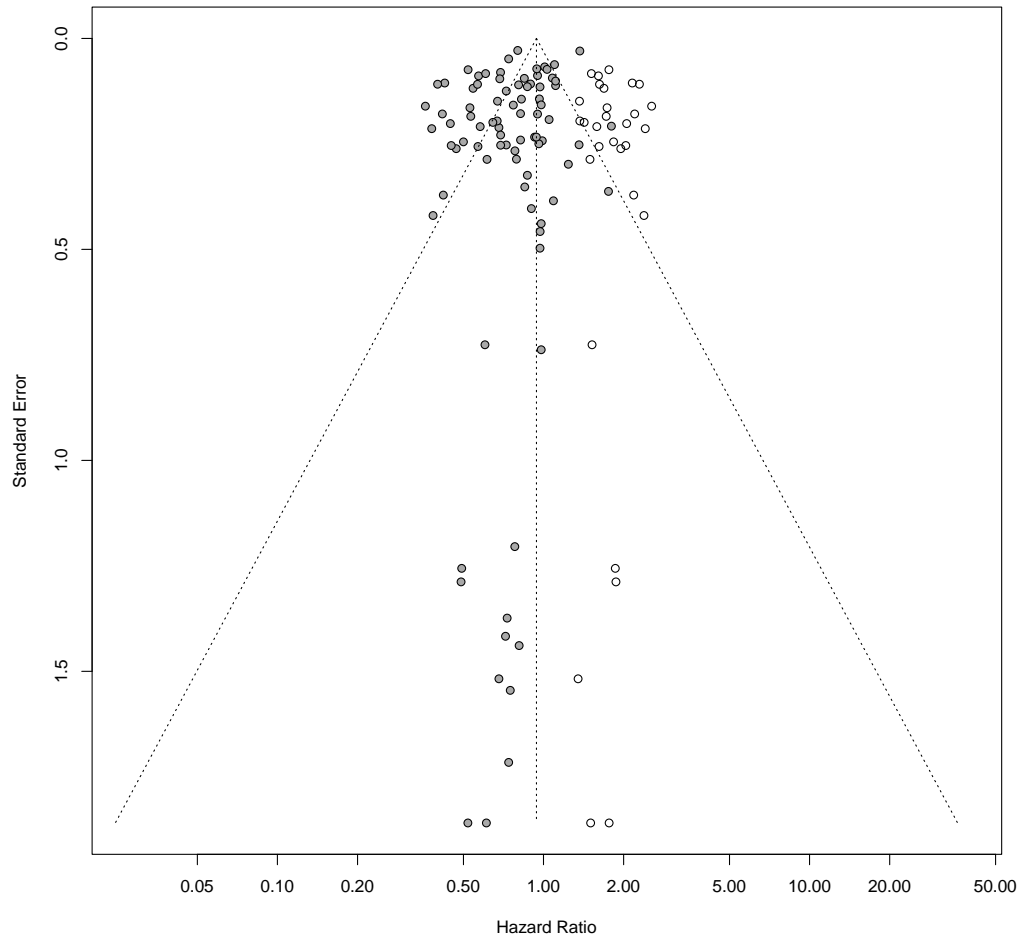

509 **eFigure 4. Funnel plot showing asymmetry and suggesting possible publication bias with original studies**  
510 **(dark circles) and 30 imputed missing studies (white circles) using the trim-and-fill method. The original**  
511 **pooled hazard ratio for overall survival is 0.76 (95% CI, 0.69-0.82). The pooled hazard ratio for overall**  
512 **survival with imputed missing studies is 0.94 (95% CI, 0.86-1.03).**  
513  
514  
515
