# Supplementary material
Source: PubMed Central journal article supplement (PMC11106715)
Supplement: jama-e246281-s002.pdf [file jama-e246281-s002.pdf]

## **Data Sharing Statement**

### **Data**

**Data available:** Yes

**Data types:** Data (not involving human participants)

**How to access data:** [osf.io/b7h9w](https://osf.io/b7h9w)

**When available:** With publication

### **Supporting Documents**

**Document types:** None

### **Additional Information**

**Who can access the data:** researchers whose proposed use of the data has been approved

**Types of analyses:** for a specified purpose

**Mechanisms of data availability:** with investigator support
